**Title:** The integration of visual and target signals in V4 and IT during visual object search

**Authors:** Noam Roth and Nicole C. Rust

**Affiliation:** Department of Psychology, University of Pennsylvania, Philadelphia, PA USA

**Running title:** V4 and IT during visual object search

**Corresponding author:**

Nicole Rust

Department of Psychology

University of Pennsylvania

Goddard Labs, 428

Philadelphia, PA 19104

Phone: (215) 898-4587

Email: nrust@psych.upenn.edu

**Acknowledgements:** We thank Margot P. Wohl and Krystal Henderson for their technical contributions. This work was supported by the National Eye Institute of the US National Institutes of Health (award number R01EY020851), the Simons Foundation (through an award from the Simons Collaboration on the Global Brain), and the McKnight Endowment for Neuroscience.

## ABSTRACT

Many everyday tasks require us to flexibly map incoming sensory information onto behavioral responses based on context. One example is the act of searching for a specific object, which requires our brain to compare the items in view with a remembered representation of a sought target to determine whether a target match is present. During object search, this comparison is thought to be implemented, in part, via the combination of top-down modulations reflecting target identity with feed-forward visual representations. However, it remains unclear whether these top-down signals are integrated at a single locus within the ventral visual pathway (e.g. V4) or at multiple stages (e.g. both V4 and inferotemporal cortex, IT). To investigate, we compared neural responses in V4 and IT recorded as rhesus monkeys performed a task that required them to identify when a target object appeared across variation in position, size and background context. We found non-visual, task-specific signals in both V4 and IT. To evaluate the plausibility that V4 was the only locus for the integration of top-down signals, we evaluated a number of feed-forward accounts of processing from V4 to IT, including a model in which IT preferentially sampled from the best V4 units, as well as a model that allowed for nonlinear IT computation. IT task-specific modulation could not be accounted for by any of these feed-forward descriptions, suggesting that during object search, top-down signals are integrated directly within IT itself.

## SIGNIFICANCE

To find specific visual objects, the brain must combine top-down information reflecting the identity of a sought target with visual information about objects in view. While top-down signals are known to exist at multiple stages along the ventral visual pathway, the route with which they arrive in each brain area is unclear. Here we present evidence that task-relevant signals in one high-level visual brain area, IT, cannot be described as simply being inherited from an earlier stage of processing, V4, and thus must be integrated directly within IT itself. This study is the first to systematically compare the responses of V4 and IT during an object search task in which objects can appear in different real-world configurations, and it provides important constraints on the neural computations responsible for finding visual targets.

## INTRODUCTION

Finding a sought object, such as our car keys, requires our brains to perform at least two non-trivial computations. First, we must determine the identities of the objects in view, across variation in details such as their position, size, and background context. Second, we must compare this visual representation (of what we are looking at) with a remembered representation (of what we are looking for) to determine whether our target is in view. Considerable evidence suggests that computations in the primate ventral visual pathway, including brain areas V1, V2, V4 and IT, support the process of invariant object recognition (reviewed by DiCarlo et al. 2012). Within V4 and IT, many neurons are also modulated by information about target identity as well as whether an image is a target match (Haenny et al. 1988; Maunsell et al. 1991; Eskandar et al. 1992; Leuschow et al. 1994; Gibson and Maunsell 1997; Chelazzi et al. 1998; Chelazzi et al. 2001; Bichot et al. 2005; Pagan et al. 2013; Kosai et al. 2014; Roth and Rust 2018). However, the route by which these signals arrive in V4 and IT remains unclear.

Here we present two classes of proposals describing how top-down signals reflecting the identity of a sought target and/or whether the object in view is a target match might arrive within V4 and IT during target search. In the first (Fig 1a), V4 serves as the sole locus of the combination of visual and top-down information, and IT receives this information via feed-forward propagation from V4. In the second (Fig 1b), top-down information is integrated directly in IT. This class includes proposals in which top-down information is integrated in both V4 and IT (Fig 1b, left) as well as proposals in which IT serves as the sole locus for the integration of top-down information, and V4 receives this information from IT through feedback (Fig 1b, right).

**Figure 1.** *Proposals for how top-down target and/or target match information might arrive within V4 and IT during object search. a)* The class of “IT: inherited” proposals predict that top-down information is integrated only in V4, and this information is then inherited by IT via feed-forward propagation. **b)** The class of “IT: integrated” proposals predict that top-down information is integrated directly in IT. This class includes proposals in which top-down information is integrated in both V4 and IT (*left*) as well as proposals in which top-down information is integrated exclusively in IT but is then fed-back to V4 (*right*).

At least some evidence exists to support all of the proposals presented in Figure 1, albeit sometimes indirect. Support for multi-locus descriptions (Fig 1b, left) comes from studies reporting that non-visual, task-relevant signals increase in a gradient-like fashion across the early visual hierarchy (i.e. V1, V2 and V4) during covert spatial attention and feature-based attention tasks (reviewed by Noudoost et al. 2010), consistent with the integration of top-down signals at multiple stages. By extension, top-down signals could be integrated in both V4 and IT during visual target search. Importantly, if a gradient of top-down modulation were to exist between V4 and IT, this would not necessarily imply multiple stages of top-down integration, as a gradient is also consistent with top-down integration in IT followed by feedback to V4 (Fig 1b, right). Evidence supports this scheme in V1, V2 and V4 (Buffalo et al. 2010).

In contrast to the proposals presented in Fig 1b, proposals in which V4 serves as the sole locus of top-down integration (Fig 1a) predict matched amounts of non-visual, task-relevant modulation between V4 and IT, and the few studies that have measured it are most consistent with this prediction, both during visual target search (Chelazzi et al. 1998; Chelazzi et al. 2001) as well as one covert spatial attention task (Moran and Desimone 1985). Additional support for a single locus of top-down integration within the ventral visual pathway comes from comparisons of target match signals in IT and a stage of processing just beyond it, perirhinal cortex, where perirhinal target match information is reported to be well-accounted for via purely feed-forward input from IT (Pagan et al. 2013; Pagan and Rust 2014; Pagan et al. 2016).

Here we focus on differentiating between the proposals presented in Figure 1 by probing the responses of V4 and IT neurons during a visual object search task that capitalizes on differences in how V4 and IT represent object identity across identity-preserving transformations.

# METHODS

## Experimental Design

Experiments were performed on two adult male rhesus macaque monkeys (*Macaca mulatta*) with implanted head posts and recording chambers. All procedures were performed in accordance with the guidelines of the University of Pennsylvania Institutional Animal Care and Use Committee. A portion of the data recorded in one brain area (IT) was presented in an earlier report (Roth and Rust 2018).

## The invariant delayed-match-to-sample (IDMS) task

Monkey behavioral training and testing utilized standard operant conditioning, head stabilization and infrared video eye tracking. Custom software (<http://mworks-project.org>) was used to present stimuli on an LCD monitor with an 85 Hz refresh rate.

The monkeys performed an invariant delayed-match-to-sample task (Fig 2). As an overview, the task required the monkeys to make a saccade when a target object appeared within a sequence of distractor images (Fig 2a). Objects were presented at differing positions, sizes and background contexts (Fig 2b). Stimuli consisted of a fixed set of 20 images that included 4 target objects, each presented at 5 different identity-preserving transformations (Fig 2c). Each short block (~3 min) was run with a fixed target object before another target was pseudorandomly selected. Our design included two types of trials: cue trials and test trials (Fig 2a). Only test trials were analyzed for this report.

A trial began when the monkey fixated on a red dot ( $0.15^\circ$ ) in the center of a gray screen, within a square window of  $\pm 1.5^\circ$ . Fixation was followed by a 250 ms delay before a stimulus appeared. Cue trials, which indicated the current target object, were presented at the beginning of each short block or after three subsequent error trials. To minimize confusion, cue trials were designed to be distinct from test trials and began with the presentation of an image of each object that was distinct from the images used on test trials (a large version of the object presented at the center of gaze on a gray background; Fig 2a). Test trials began with a distractor image, and neural responses to the first distractor were discarded to minimize non-stationarities such as stimulus onset effects. During the DMS task, all images were presented at the center of gaze, in a circular aperture that blended into a gray background (Fig 2b).

In each block, 5 images were presented as target matches and the other 15 as distractors. Distractor images were drawn randomly without replacement until each distractor was presented once on a correct trial, and the images were then re-randomized. On most test trials, a target match followed the presentation of a random number of 1-6 distractors (Fig 2a). On a small fraction of trials, 7 distractors were shown, and the monkeys were rewarded for fixating through all distractors. Each image was presented for 400 ms (or until the monkeys' eyes left the fixation window) and was immediately followed by the presentation of the next stimulus. Monkeys were rewarded for making a saccade to a response target within a window of 75 – 600 ms after the target match onset. In monkey 1, the response target was positioned 10 degrees below fixation; in monkey 2 it was 10 degrees above fixation. If the monkeys had not yet moved their eyes after 400 ms following target onset, a distractor stimulus was immediately presented. A trial was classified as a 'false alarm' if the eyes left the fixation window via the top (monkey 1) or bottom

(monkey 2) outside the allowable correct response period and travelled more than 0.5 degrees. In contrast, all other instances in which the eyes left the fixation window during the presentation of distractors were characterized as fixation breaks. A trial was classified as a 'miss' when the monkey continued fixating beyond 600 ms following the onset of the target match. Within each block, 4 repeated presentations of each of the 20 images were collected, and a new target object was then pseudorandomly selected. Following the presentation of all 4 objects as targets, the targets were re-randomized. At least 10 repeats of each condition were collected on correct trials. When more than 10 repeats were collected, the first 10 were used for analysis. Overall, monkeys performed this task with high accuracy. Disregarding fixation breaks (monkey 1: 8% of trials, monkey 2: 11% of trials), percent correct on the remaining trials was: monkey 1: 94% correct, 2% false alarms, and 4% misses; monkey 2: 98% correct, ~1% false alarms, and ~1% misses. Behavioral performance was comparable for the sessions corresponding to recordings from the two areas (V4 percent correct overall = 96.5%; IT percent correct overall = 91.4%).

V4 receptive fields at and near the center of gaze are small: on average they have radii of 0.56 degrees at the fovea, extending to radii of 1.4 at an eccentricity of 2.5 degrees (Desimone and Schein 1987; Gattass et al. 1988). We thus took considerable care to ensure that the images were approximately placed in the same region of these receptive fields across repeated trials. In one monkey, fixational control was good after training (on average 85 and 97% of presentations occurred within a radius of 0.56 and 1.4 degrees respectively). In a second monkey, adequate fixational control could not be achieved through training. We thus applied a procedure in which we shifted each image at stimulus onset 25% toward the center of gaze (e.g. if the eyes were displaced 0.5 degrees to the left, the image was repositioned 0.125 degrees to the left and thus 0.375 degrees from fixation). Image position then remained fixed until the onset of the next stimulus. The resulting deviation across trials, measured relative to the mean position across trials, was comparable to monkey 1: on average, 95, and 99% of presentations occurred within windows with a radius of 0.56 and 1.4 degrees, respectively.

## Neural recording

The activity of neurons in V4 and IT was recorded via a single recording chamber for each brain area in each monkey. In both monkeys, chamber implantation and recording in IT preceded V4, and the IT recording chamber was implanted on the right hemisphere whereas the V4 recording chamber was implanted on the left hemisphere. While IT receptive fields span the vertical meridian, thus allowing us to access the visual representation of both sides with a single chamber, V4 receptive fields are confined to the contralateral hemifield. To simulate V4 coverage of the ipsilateral visual field, on roughly half of the V4 recording sessions, (n = 7/15 sessions in Monkey 1, n = 11/20 sessions in Monkey 2), we presented the images reflected across the vertical axis. We then treated all V4 units recorded during these sessions as if they were in the left hemisphere (and thus as receptive fields that were located in the right visual field).

Chamber placement for the IT chambers was guided by anatomical magnetic resonance images in both monkeys, and in one monkey, Brainsight neuronavigation (<https://www.rogue-research.com/>). Both V4 chambers were guided by Brainsight neuronavigation. The region of IT recorded was located on the ventral surface of the brain, over an area that spanned 4 mm lateral to the anterior middle temporal sulcus and 15-19 mm anterior to the ear canals. Both V4 chambers were centered 1 mm posterior to the ear canals and 29 mm lateral to the midline,



positioned at a 30 degree angle. V4 recording sites were confirmed by a combination of receptive field location and position in the chamber, corresponding to results reported previously (Gattass et al. 1988). Specifically, we recorded from units within and around the inferior occipital sulcus, between the lunate sulcus and superior temporal sulcus. V4 units in lower visual field were confirmed as having receptive field centers that traversed from the vertical to horizontal meridian as recordings shifted from posterior to anterior. As expected, V4 units in the fovea and near the upper visual field were found lateral to those in the lower visual field, and had receptive field centers that traversed from the horizontal meridian to the vertical meridian as recordings traversed medial to lateral and increased in depth.

Neural activity was recorded with 24-channel U-probes and V-probes (Plexon, Inc) with linearly arranged recording sites spaced with 100 mm intervals. Continuous, wideband neural signals were amplified, digitized at 40 kHz and stored using the OmniPlex Data Acquisition System (Plexon, Inc.). Spike sorting was done manually offline (Plexon Offline Sorter). At least one candidate unit was identified on each recording channel, and 2-3 units were occasionally identified on the same channel. Spike sorting was performed blind to any experimental conditions to avoid bias. A multi-channel recording session was included in the analysis if the animal performed the task until the completion of at least 10 correct trials per stimulus condition, there was no external noise source confounding the detection of spike waveforms, and the session included a threshold number of task-modulated units (>4 on 24 channels). The sample size for IT (number of units recorded) was chosen to approximately match our previous work (Pagan et al. 2013; Pagan and Rust 2014). The sample size for V4, was selected to be 3-fold that number, to match the ratio between numbers of units estimated in V4 as compared to IT (DiCarlo et al. 2012).

For many of the analyses presented in this paper, we measured neural responses by counting spikes in a window that began 40 ms after stimulus onset in V4 and 80 ms after stimulus onset in IT. We counted spikes in a 170 ms window in both areas, such that the spike counting windows were of equal length. Counting windows always preceded the monkeys' reaction times. On 7.7% of all correct target match presentations, the monkeys had reaction times faster than 250 ms, and those instances were excluded from analysis to ensure that spikes in both V4 and IT were only counted during periods of fixation.

In IT, we recorded neural responses across 20 experimental sessions (Monkey 1: 10 sessions, and Monkey 2: 10 sessions). In V4, we recorded neural responses across 35 experimental sessions (Monkey 1: 15 sessions, and Monkey 2: 20 sessions). When combining the units recorded across sessions into a larger pseudopopulation, we began by screening for units that met three criteria. First, units needed to be modulated by our task, as quantified by a one-way ANOVA applied to our neural responses (80 conditions \* 10 repeats,  $p < 0.01$ ). Second, units needed to pass a loose criterion on recording stability, as quantified by calculating the variance-to-mean ratio (Fano factor) for each unit, computed by fitting the relationship between the mean and variance of spike count across the 80 conditions (Fano factor  $< 2.5$ ). Finally, units needed to pass a loose criterion on unit recording isolation, quantified by calculating the signal-to-noise ratio (SNR) of the waveform as the difference between the maximum and minimum points of the average waveform, divided by twice the standard deviation across the differences between each waveform and the mean waveform (SNR  $> 2$ ). In IT, this yielded a pseudopopulation of 193 units (of 563 possible units), including 98 units from monkey 1 and 95 units from monkey 2. In V4, this yielded a pseudopopulation of 598 units (of 970 possible units), including 345 units from monkey 1 and 253 units from monkey 2.

## V4 receptive field mapping

To measure the location and extent of V4 receptive fields, bars were presented for 500 ms, one per trial, centered on a 5 x 5 invisible grid. Bar orientation, length, and width as well as the grid center and extent were adjusted for each recording session based on preliminary hand mapping. On each trial, the monkey was required to maintain fixation on a small response dot (0.125°) to receive a reward. The responses to at least five repeats were collected at each position for each recording session. Only those units that produced clear visually evoked responses at a minimum of one position were considered for receptive field position analysis. The center of the receptive field was estimated by the maximum of the response across the 5x5 grid of oriented bar stimuli and confirmed by visual inspection.

## Quantifying single-unit modulations

To quantify the degree to which individual V4 and IT units were modulated by task-relevant variables (Figs 4, 7, 8), such as changes in visual and target identity, we applied a bias-corrected, ANOVA-like procedure described in detail by (Pagan and Rust 2014) and summarized here. As an overview, this procedure is designed to parse each unit's total response variance into variance that can be attributed to each type of experimental parameter as well as variance that can be attributed to trial variability. Total variance is computed across the spike count responses for each unit across 16 conditions (4 images \* 4 targets for each transformation) and 10 trials. Variances are then transformed into measures of spike count modulation (in the units of standard deviation around each unit's grand mean spike count) via a procedure that includes bias correction for over-estimates in modulation due to noise.

To capture all types of modulation with intuitive groupings, the procedure begins by developing an orthonormal basis of 16 vectors. The number of basis vectors for each type of modulation is imposed by the experimental design. In particular, this basis  $\mathbf{b}$  included vectors  $\mathbf{b}_i$  that reflected 1) the grand mean spike count across all conditions, 2) whether the object in view was a target or a distractor ('target match'), 3) visual image identity ('visual'), 4) target object identity ('target identity'), and 5) nonlinear interactions between target and object identity not captured by target match modulation ('residual'). The initially designed set of vectors is converted into an orthonormal basis via a Gram-Schmidt orthogonalization process.

The resulting basis spans the space of all possible responses for our task. Consequently, we can re-express each trial-averaged vector of spike count responses to the 16 experimental conditions for each transformation,  $\mathbf{R}$ , as a weighted sum of these basis vectors. The weight corresponding to a basis vector for each unit reflect modulation of that unit's responses by that experimental parameter. To quantify the amounts of each type of modulation reflected by each unit, we began by computing the squared projection of each basis vector  $\mathbf{b}_i$  and  $\mathbf{R}$ . To correct for bias caused by over-estimates in modulation due to noise, an analytical bias correction, described and verified in (Pagan and Rust 2014), was then subtracted from this value. The squared weight for each basis vector  $\mathbf{b}_i$  is calculated as:

$$(1) w_i^2 = (\mathbf{R} \cdot \mathbf{b}_i^T)^2 - \frac{\sigma_t^2 \cdot (\mathbf{b}_i^T)^2}{m}$$



where  $\sigma_t^2$  indicates the trial variance, averaged across conditions ( $n=16$ ), and  $m$  indicates the number of trials ( $m=10$ ). If more than one dimension existed for a type of modulation, we summed values of the same type (eq. 2). Next, we applied a normalization factor ( $1/(n-1)$ ) where  $n=16$ ) to convert these summed values into variances. As a final step, we computed the square root of these quantities to convert them into modulation measures that reflected the number of spike count standard deviations around each unit's grand mean spike count. Modulation for each parameter type  $X$  was thus computed as:

$$(2) \sigma_X = \sqrt{\frac{1}{n-1} \cdot \sum_{i=j}^k w_i^2}$$

for the weights  $w_j$  through  $w_k$  corresponding to basis vectors  $b_j$  through  $b_k$  for that parameter type, where the number of basis vectors corresponding to each parameter type were: target match = 1; visual = 3; target identity = 3; residual = 8.

When estimating modulation for individual units, (Fig 4), the bias-corrected squared values were rectified for each unit before taking the square root. When estimating modulation population means (Fig 7b-e, Fig 8), the bias-corrected squared values were averaged across units before taking the square root. Because these measures were not normally distributed, standard error about the mean was computed via a bootstrap procedure. On each iteration of the bootstrap (across 1000 iterations), we randomly sampled values from the modulation values for each unit in the population, with replacement. Standard error was computed as the standard deviation across the means of these resampled populations.

### **Population performance: Visual object invariance**

To determine performance of the V4 and IT populations at classifying visual object identity (Fig 5), we computed 4-way object discrimination performance. As an overview, we formulated the problem as four one-versus-rest linear classifications, and then took the maximum of these classifications as a population's decision (Hung et al. 2005). Here we begin by describing the general form of linear classifier that we used, a Fisher Linear Discriminant (FLD), and we then describe the training and testing scheme for measuring cross-validated performance.

The general form of a linear decoding axis is:

$$(3) f(x) = \mathbf{w}^T \mathbf{x} + b,$$

where  $\mathbf{w}$  is an  $N$ -dimensional vector containing the linear weights applied to each of  $N$  units, and  $b$  is a scalar value. We fit these parameters using an FLD, where the vector of linear weights was calculated as:

$$(4) \mathbf{w} = \Sigma^{-1}(\mu_1 - \mu_2)$$

and  $b$  was calculated as:

$$(5) b = \mathbf{w} \cdot \frac{1}{2}(\mu_1 + \mu_2) = \frac{1}{2}\mu_1^T \Sigma^{-1} \mu_1 - \frac{1}{2}\mu_2^T \Sigma^{-1} \mu_2$$

Here  $\mu_1$  and  $\mu_2$  are the means of two classes (e.g. two object classes, respectively) and the mean covariance matrix is calculated as:

$$(6) \Sigma = \frac{\Sigma_1 + \Sigma_2}{2}$$

where  $\Sigma_1$  and  $\Sigma_2$  are the regularized covariance matrices of the two classes. These covariance matrices were computed using a regularized estimate equal to a linear combination of the sample covariance and the identity matrix  $I$  (Pagan and Rust 2014):

$$(7) \Sigma_i = \gamma \Sigma_i + (1 - \gamma) \cdot I$$

We determined  $\gamma$  by exploring a range of values from 0.01 to 0.99, and we selected the value that maximized average performance across all iterations, measured with the cross-validation “regularization” trials set aside for this purpose (see below). We then computed performance for that value of  $\gamma$  with separately measured “test” trials, to ensure a fully cross-validated measure. Because this calculation of the FLD parameters incorporates the off-diagonal terms of the covariance matrix, FLD weights are optimized for both the information conveyed by individual units as well as their pairwise interactions.

To classify which of four objects was in view, we used a standard “one-versus-rest” classification scheme. Specifically, one linear classifier was determined for each object based on the training data. To determine the population decision about which object was presented, a response vector  $\mathbf{x}$ , corresponding to the population response of one of the four objects, was then applied to each of the classifiers, and the classifier with the largest output (the classifier with the largest, positive  $f(\mathbf{x})$ ) was taken as the population decision. To train the classifiers, we used an iterative resampling procedure. On each iteration of the resampling, we randomly shuffled the trials for each condition and for each unit, and (for numbers of units less than the full population size) randomly selected units. On each iteration, 8 trials from each condition were used for training the decoder, 1 trial from each condition was used to determine a value for regularization, and 1 trial from each condition was used for cross-validated measurement of performance.

We compared classifier performance for the “reference” cases (when cross-validated test trials were selected from the same transformation used to train the classifier; Fig 5a-b, black) versus the “generalization” cases (when test trials were selected from transformations different than the one used for training, Fig 5a-b, cyan). To summarize the results for a given transformation, reference and generalization performance was compared for the same test data: e.g. In the case of the transformation “Up”, reference performance was computed by training and cross-validated testing on “Up” and generalization performance was computed as the average of training on all other transformations and testing on “Up”.

To ensure that visual classification performance was not biased by the target match signal, we computed performance for targets and distractors separately and averaged their results. Specifically, we computed visual classification performance for the four objects presented as target matches or for different combinations of the four objects presented as distractors. Each set of 4 distractors was selected to span all possible combinations of mismatched object and target identities (e.g. objects 1, 2, 3, 4 paired with targets 4, 3, 2, 1), of which there are 9 possible sets. As a final measure of visual classification performance, we averaged across 10 performance values (1 target match and 9 distractor combinations) as well as, when relevant, multiple transformations. One performance value was computed on each iteration of the resampling procedure, and mean and standard error of performance was computed as the mean and standard deviation of performance across 1000 resampling iterations. Standard error

thus reflected the variability due to the specific trials assigned to training and testing and, for populations smaller than the full size, the specific units chosen. Finally, generalization capacity was computed on each resampling iteration by taking the ratio of the chance-subtracted reference performance and the chance-subtracted generalization performance (where chance = 25%).

### **Population performance: Target match information**

To determine the ability of the V4 and IT populations to classify target matches versus distractors (Figs 9 & 10), we applied two types of decoders: a linear classifier (an FLD, described above) and a Maximum Likelihood decoder (a decoder that can classify based on linear as well as nonlinearly formatted target match information). Both decoders were cross-validated with the same resampling procedure. On each iteration of the resampling, we randomly shuffled the trials for each condition and for each unit, and (for numbers of units less than the full population size) randomly selected units (with the exception of Fig 9c, cyan, where we selected the ‘best’ units, as described below). On each iteration, 8 trials from each condition were used for training the decoder, 1 trial from each condition was used to determine a value for regularization of the FLD linear classifier (see below) and 1 trial from each condition was used for a cross-validated measurement of performance.

To circumvent issues related to the format of visual information, classifier analyses were performed per transformation (“Big”, “Up”, “Left” and “Small”). The data for each transformation consisted of 16 conditions (4 visual objects viewed under 4 different target contexts). To ensure that decoder performance relied only on target match information and not on other factors, such as differences in the numbers of each class, each classification was computed for 4 target matches versus 4 (of 12 possible) distractors. Each set of 4 distractors was selected to span all possible combinations of mismatched object and target identities (e.g. objects 1, 2, 3, 4 paired with targets 4, 3, 2, 1), of which there are 9 possible sets. Performance was computed on each resampling iteration by averaging the binary performance outcomes across the 9 possible sets of target matches and distractors, each which contained 8 cross-validated test trials, and across the four transformations used. For both types of classifiers, mean and standard error of performance was computed as the mean and standard deviation of performance across 1000 resampling iterations. Standard error thus reflected the variability due to the specific trials assigned to training and testing and, for populations smaller than the full size, the specific units chosen.

To compute linear classifier performance (Fig 9), we used a 2-way Fisher Linear Discriminant, described as in the general form above. In this case, the classes described in eqs. 4-6 correspond to target matches and distractors. To compute neural population performance, we began by computing the dot product of the test data and the linear weights  $\mathbf{w}$ , adjusted by  $b$  (Eq. 5). Each test trial was then assigned to one class, and proportion correct was then computed as the fraction of test trials that were correctly assigned, according to their true labels. To compute linear classifier performance for the best V4 units (Fig 9c, cyan), we ranked units by their  $d'$  based on the training data and sub-selected top-ranked units to measure cross-validated performance. Unit  $d'$  was computed as:

$$(8) \ d' = \frac{|\mu_{Match} - \mu_{Distractor}|}{\sigma_{pooled}},$$

where  $\mu_{Match}$  and  $\mu_{Distractor}$  correspond to the mean across the set of target match and distractors,  $\sigma_{pooled} = \sqrt{\frac{\sigma_{Match}^2 + \sigma_{Distractor}^2}{2}}$ , and  $\sigma_{Match}$  and  $\sigma_{Distractor}$  correspond to the standard deviation across the set of target matches and distractors, respectively.

As a measure of total target match information (Fig 10; combined linear and nonlinear), we implemented a maximum likelihood decoder (Pagan et al. 2013; Pagan et al. 2016). We began by using the set of training trials to compute the average response  $r_{uc}$  of each unit  $u$  to each of the 2 conditions  $c$  (target matches versus distractors). We then computed the likelihood that a test response  $k$  was generated from a particular condition as a Poisson-distributed variable:

$$(9) \text{lik}_{u,c}(k) = \frac{(r_{uc})^k \cdot e^{-r_{uc}}}{k!}$$

The likelihood that a population response vector was generated in response to each condition was then computed as the product of the likelihoods of the individual units. We assigned the population response to the category with the maximum likelihood, and we computed performance as the fraction of trials in which the classification was correct based on the true labels of the test data.

## Statistical analysis

Because our measures were not normally distributed, we computed  $P$  values via resampling procedures. When comparing the magnitudes of single unit modulation values between V4 and IT (Fig 4, Fig 7b-e, Fig 8), a bootstrap procedure was applied in which values were randomly sampled from the values for each unit, with replacement, across many iterations. We calculated  $P$  values as the fraction of resampling iterations on which the difference was flipped in sign relative to the actual difference between the means of the full data set (for example, if the mean of visual modulation in V4 was larger than the mean of visual modulation in IT, the fraction of iterations in which the mean of visual modulation in IT was larger than the mean of visual modulation in V4).

When comparing generalization capacity between the V4 and IT populations (Fig 5d), we began by computing generalization capacity for each of 1000 resampling iterations of the reference and generalization classifiers. We calculated  $P$  values as the fraction of resampling iterations on which the difference was flipped in sign relative to the actual difference between the means of the full data set (for example, if the mean of generalization capacity in IT was larger than the mean of generalization capacity in V4, the fraction of iterations in which the mean of generalization capacity in V4 was larger than the mean of generalization capacity in IT).

When comparing population decoding measures (Figs 5a-c, 9c, & 10c), 1000 iterations of cross-validated population performance were computed, and  $P$  values were calculated as the fraction of classifier iterations on which the difference was flipped in sign relative to the actual difference between the means across classifier iterations (for example, if the mean of decoding measure 1 was larger than the mean of decoding measure 2, the fraction of iterations in which the mean of measure 2 was larger than the mean of measure 1). When evaluating whether a population decoding measure was different from chance (Figs 9-10),  $P$  values were calculated as the

512 fraction of classifier iterations on which performance was greater than chance performance  
513 (50%).  
514  
515  
  
516

## RESULTS

To compare responses in V4 and IT, we trained two monkeys to perform an “invariant delayed-match-to-sample” (IDMS) task that required them to report when target objects appeared across variation in the objects’ positions, sizes and background contexts. Some of the data presented here were also included in an earlier publication (Roth and Rust 2018). There, we reported that during IDMS, neural signals in IT reflected behavioral confusions on the trials in which the monkeys made errors, and IT target match signals were configured in a manner that minimized their interference with IT visual representations. The focus of the current report is a determination of how these signals arrive in IT via a systematic comparison between IT and its input brain area, V4.

### The invariant delayed-match-to-sample task (IDMS)

Monkeys performed an invariant delayed-match-to-sample (IDMS) task in short blocks of trials (~3 minutes on average) with a fixed target object. Each block began with a cue trial that indicated the target for that block (Fig 2a ‘Cue Trial’). The remainder of the block was comprised primarily of test trials (Fig 2a, ‘Test trial’). Test trials began with the presentation of a distractor and on most trials, this was followed by 0-5 additional distractors (for a total of 1-6 distractor images) and then an image containing the target match. The monkeys’ task required them to maintain fixation during the presentation of distractors and make a saccade in response to the appearance of a target match to receive a juice reward. To minimize the possibility that monkeys would predict the target match, on a small fraction of the trials the target match did not appear and the monkeys were rewarded for maintaining fixation through 7 distractors. Unlike other classic DMS tasks (Eskandar et al. 1992; Chelazzi et al. 1993; Leuschow et al. 1994; Miller and Desimone 1994; Pagan et al. 2013) our experimental design does not incorporate a cue at the beginning of each test trial, to better mimic real-world object search, where target matches are not repeats of the same image presented shortly before.

**Figure 2.** *The invariant delayed-match-to-sample task (IDMS).* **a)** Monkeys initiated trials by fixating on a small dot. Each block (~3 minutes in duration) began with a cue trial which indicated the target object. On subsequent trials, a random number (1-7) of distractors were presented, and on most trials, this was followed by the target match. Monkeys were required to maintain fixation throughout the distractors and make a saccade to a response dot within a window 75 - 600 ms following the onset of the target match to receive a reward. In cases where the target match was presented for 400 ms and the monkey had still not broken fixation, a distractor stimulus was immediately presented. **b)** A schematic of the full experimental design, which included 80 conditions: looking “at” each of 4 objects, each presented at 5 identity-preserving transformations (for 20 images in total), viewed in the context of looking “for” each object as a target. In this design, target matches (gray) fall along the diagonal of each “looking at” / “looking for” transformation slice whereas distractors (white) fall off the diagonal. **c)** Images used in the task: 4 objects were presented at each of 5 identity-preserving transformations (“up”, “left”, “right”, “big”, “small”), for 20 images in total. In any given block, 5 of the images were presented as target matches and 15 were distractors. **d)** Percent correct for each monkey, calculated based on both misses and false alarms (but disregarding fixation breaks), shown as



a function of the number of distractors preceding the target match. Error bars indicate standard error across experimental sessions. **e)** Histograms of reaction times during correct trials (ms after stimulus onset), with means labeled.

Our experimental stimuli consisted of a fixed set of 20 images: 4 objects presented at each of 5 transformations (Fig 2b). These specific images were selected in order to make the task of classifying object identity challenging for the IT population and these specific transformations were selected based on findings from our previous work (Rust and DiCarlo 2010). In a given target block (e.g. a ‘banana block’), a subset of 5 of the images were target matches and the remaining 15 were distractors (Fig 2c). The full experimental design amounted to 20 images (4 objects presented at 5 identity-preserving transformations), all viewed in the context of each of the 4 objects as a target, resulting in 80 experimental conditions (Fig 2b). In this design, “target matches” fall along the diagonal of each looking at / looking for matrix slice (where a matrix “slice” corresponds to the conditions at one fixed transformation; Fig 2b, gray). For each of the 80 conditions, we collected at least 10 repeats on correct trials. Behavioral performance was high overall (Fig 2d). The monkeys’ mean reaction times (computed as the time their eyes left the fixation window relative to the target match stimulus onset) were 311 ms and 363 ms for monkey 1 and 2, respectively (Fig 2e).

To systematically compare the responses of V4 and IT during this task, we applied a population-based approach in which we fixed the images and their placement in the visual field across all the units that we studied, and we sampled from units whose receptive fields overlapped the stimuli. Specifically, we presented images at the center of gaze, with a diameter of 5 degrees. Neurons in IT typically have receptive fields that extend beyond 5 degrees and extend into all four quadrants (Fig 3a top; Op De Beeck and Vogels 2000). In contrast, V4 receptive fields are smaller, retinotopically organized, and confined to the contralateral hemifield (Fig 3a bottom; Desimone and Schein 1987; Gattass et al. 1988). To compare these two brain areas, we applied extensions of approaches developed in our earlier work in which we compared the responses of a set of randomly sampled IT units with a population of V4 units whose receptive fields tiled the image (Rust and DiCarlo 2010). This required sampling V4 units with receptive fields in both upper and lower visual fields, which we achieved through recording at different positions within and around the inferior occipital sulcus. This also required measuring units with receptive fields on both sides of the vertical meridian, which we approximated by isolating our recordings to one hemisphere but reflecting the images along the vertical axis in approximately half the sessions.

**Figure 3. V4 and IT receptive field locations.** Images were displayed at the center of gaze and were 5 degrees in diameter. Red circles indicate the location and size of the images. **a)** Schematic of expected receptive field locations and sizes for neurons in IT (top; Op De Beeck and Vogels 2000) V4 (bottom; Desimone and Schein 1987; Gattass et al. 1988). **b)** We targeted V4 units with receptive fields that tiled the images. After approximate receptive field localization with hand mapping, receptive field locations were determined with oriented bar stimuli presented in a 5 x 5 grid of different positions (see Methods). Shown are the receptive field centers of a subset of recorded V4 units; one dot is shown for each unique receptive field

location recorded. On approximately half of the sessions, images were reflected across the vertical axis, and for these sessions, the receptive field centers are plotted in the ipsilateral visual field. Monkey 1: gray; Monkey 2: white.

Because V4 receptive fields in the region of the field that we recorded are small, one issue of concern is the replicability of retinal image placement across trials. We quantified the stability of monkeys' eye positions across repeated trials as the percent of eye positions that were within windows corresponding to V4 receptive field sizes at the range of eccentricities we recorded (Gattass et al. 1988). We found that 89% of eye positions fell within windows corresponding to the average RF sizes at the fovea (average foveal receptive field size = 0.56 degrees), and 98% of eye positions were within windows corresponding to RF sizes at an eccentricity of 2.5 degrees (average receptive field size at 2.5 degrees = 1.4 degrees). To achieve this in Monkey 2, fixational control was improved by aligning the images closer to the center of gaze at stimulus onset (see Methods). These approaches were effective in producing similar distributions of trial-by-trial variability between V4 and IT, as measured by the mean and standard deviation of the variance-to-mean ratio (Fano factor) across units (mean +/- std, V4 = 1.41 +/- 0.3; IT = 1.35 +/- 0.33).

As two monkeys performed this task, we recorded neural activity from small populations using 24-channel probes that were acutely lowered into V4 or IT before each session. With the rationale that V4 contains approximately 3-fold more units than IT near the fovea (DiCarlo et al. 2012), we aimed to collect 3-fold more units from V4. Following a screen for units based on their stability, isolation, and task modulation (see Methods), our data included 598 V4 units and 193 IT units (Monkey 1: 345 units in V4 and 98 in IT; Monkey 2: 253 units in V4 and 95 in IT). The data reported here were extracted from trials with correct responses. For all analyses except Fig 7, we counted spikes in equal length windows in V4 and IT but adjusted for the difference in latency between the two brain areas (170 ms, V4: 40-210 ms; IT: 80-250 ms following stimulus onset). These windows always preceded the monkeys' reaction times and thus corresponded to periods of fixation.

#### **Visual modulation as a benchmark for verifying V4 and IT data:**

When making systematic comparisons between V4 and IT, there are important factors to consider. For example, should the information contained in the V4 and IT populations be compared with equal numbers of units? Similarly, what are appropriate benchmarks for determining whether the samples recorded from each brain area are representative? As an example, imagine a scenario in which the same information about whether an image is a target match or a distractor is reflected in both V4 and IT to the same degree, but the V4 neurons recorded in an experiment all have small, overlapping receptive fields confined to the same, small region of the visual field. In contrast, IT neurons, by virtue of their large receptive fields, would have access to much more of the visual field. From this data we might erroneously find that the magnitude of total target match information is larger in IT than V4 by way of non-representative sampling.

As a benchmark for assessing whether the data we recorded from each brain area were representative, we compared the amount of visual modulation present in each brain area, at each transformation, with the following rationale. First, all the visual information contained in IT is thought to arrive there after first travelling through V4 (Felleman and Van Essen 1991), and consequently, samples of V4 and IT are comparable only if visual information is equal or higher in the V4 sample. Second, comparisons of visual information at each transformation independently circumvent issues related to well-established differences in the format of visual information between the two brain areas: object identity (across changes in object position, size and background context) is more accessible to a linear read-out in IT whereas it is more nonlinear in V4 (e.g. Rust and DiCarlo 2010).

To compare the amounts of visual information in our recorded V4 and IT populations, we computed a single-unit measure of visual modulation that disentangles modulations due to changes in visual identity from other factors, such as top-down target modulation. This measure quantifies the modulation in a unit's spike count that can be attributed to changes in the identity of the object in view, computed separately for each of the 5 transformations. Specifically, the analysis employs a bias-corrected procedure that quantifies different types of modulation in terms of the number of standard deviations around each unit's grand mean spike count (Pagan and Rust 2014). For three of the five transformations ('left', 'small', 'up'), mean visual modulation was statistically indistinguishable between V4 and IT (Fig 4a-c). For one transformation ('big'; Fig 4d) mean visual modulation was larger in V4, but we retained this transformation for subsequent analyses because its incorporation reflected a worst-case scenario against the sampling problem of concern (i.e. one in which V4 has been inadequately sampled). In contrast, for the final transformation ('right'; Fig 4f), the V4 population had significantly lower performance than IT ( $p < 1e10^{-5}$ ), and investigation of the recorded receptive field locations (Fig 3b) revealed that this was likely due to incomplete sampling at that location. As such, we disregarded this transformation from further analyses. Subsequent analyses are focused on the 4 of 5 transformations in which visual modulation, averaged across transformations, was not statistically distinguishable in V4 as compared to IT, either in the pooled data or in either monkey (Fig 4f; Monkey 1: V4 mean = 0.26, IT mean = 0.21,  $p = 0.08$ ; Monkey 2: V4 mean = 0.16, IT mean = 0.17,  $p = 0.53$ ). The fact that visual modulation is matched between V4 and IT across these four transformations suggests that the two populations can and should be compared with approximately matched numbers of units, consistent with previous reports (Rust and DiCarlo 2010).

**Figure 4. Comparison of visual modulation in V4 and IT.** Shown are distributions of visual modulation magnitudes across units, parsed by transformation for V4 (open bars,  $n = 598$  units) and IT (gray,  $n = 193$  units) and plotted on a log axis. Following a bias correction to remove the impact of trial variability, visual modulation was computed in units of standard deviation around each unit's grand mean spike count. The first bin includes units with negligible visual modulation (modulation  $< 0.001$ ) and the broken axis indicates that these bars should extend to the proportions labeled just above. Means of each distribution, including units with negligible visual modulation, are indicated by arrows and values are indicated at the bottom of each panel. The p-values at the top of each panel were computed via a bootstrap significance test evaluating the probability that differences in the means between V4 and IT can be attributed to chance. **a-e)** Distributions parsed by transformation. Visual modulation corresponding to the transformation 'right' was higher in IT as compared to V4, due to incomplete sampling of receptive fields at this

location (Fig 3b), and was thus disregarded from further analyses. **f)** Distributions of visual modulation, averaged for each unit across the transformations ‘left’, ‘small’, ‘up’, and ‘big’.

### **A comparison of visual object invariance in V4 and IT**

Information about object identity, across changes in identity-preserving transformations, is reported to be more accessible to a linear read-out in IT as compared to V4 (Rust and DiCarlo 2010). To determine whether this difference between V4 and IT was reflected during the IDMS task, we measured the ability of a 4-way linear object identity classifier, trained at each transformation, to generalize to other transformations. Specifically, “reference performance” was measured as cross-validated classifier performance when the training and testing trials came from the same transformation. “Generalization performance” was measured as cross-validated classifier performance when the testing trials came from the three transformations that were not used for training. To avoid confounding visual and target match modulation, each type of performance was computed separately for target matches and distractors (in all possible combinations) and then averaged (see Methods). Finally, “generalization capacity” was measured as the ratio of generalization over reference performance after subtracting the value expected by chance (where chance = 25%).

Fig 5a depicts how reference and generalization performance grew as a function of population size in each brain area. In V4, generalization performance remained modest across all population sizes whereas V4 reference performance grew at a faster rate. In IT, both reference and generalization performance grew at non-negligible rates. Fig 5b summarizes the results in the two brain areas by plotting the endpoints of the plots in Fig 5a. Generalization capacity, computed as the ratio of generalization over reference performance, was higher in IT as compared to V4 ( $V4 = 0.16$ ;  $IT = 0.47$ ;  $p < 0.001$ ), consistent with IT reflecting a more linearly-separable object representation. This plot also reveals slightly lower reference performance in V4 for matched numbers of units (Fig 5b) despite the two populations reflecting matched average single-unit visual modulation (Fig 4f). We have determined that this small difference can be attributed to the slightly higher variance-to-mean ratio in V4 as compared to IT (reported above, mean Fano factor V4 = 1.41; mean Fano factor IT = 1.35), as opposed to other factors such how the information is tiled across the stimulus space or differences in task-relevant modulation (not shown). To confirm that IT generalization capacity remained higher even under conditions in which more total visual information was available in V4, we also computed generalization capacity for the full V4 population ( $n = 598$  units). As shown in Figure 5c, generalization capacity remained higher in IT even under these conditions (mean V4 = 0.20; mean IT = 0.47;  $p < 0.001$ ). Higher generalization capacity also held for each of the transformations individually (Fig 5d; ‘Big’  $p < 0.001$ ; ‘Left’  $p < 0.001$ ; ‘Small’  $p = 0.046$ ; ‘Up’  $p = 0.001$ ).

**Figure 5. Comparison of visual object invariance across identity-preserving transformations in V4 versus IT. a)** Performance of V4 and IT on a 4-way linear read-out of object identity, assessed either with cross-validated trials of the same transformation (“Reference”) or when asked to generalize to transformations not used for training (“Generalization”; see text). **b)** Reference and generalization performance for matched numbers of units ( $n = 193$  for both V4

and IT populations), replotted from the endpoints in panel a. Generalization capacity was computed as the ratio of generalization over reference performance after subtracting the value expected by chance (where chance = 25%). **c)** Reference and generalization performance for the full recorded V4 population (n = 598 units) as compared to the full recorded IT population replotted from panel b (n = 193 units). **d)** Generalization capacity computed for matched numbers of units in V4 and IT (n = 193 units), applied to each transformation separately. Single asterisks denote  $p < 0.05$ ; double asterisks denote  $p < 0.01$ ; triple asterisks denote  $p < 0.001$ . In all panels, error bars (standard error) reflect the variability that can be attributed to the specific subset of trials chosen for training and testing and, for subsets of units smaller than the full population, the specific subset of units chosen.

In sum, the results presented thus far demonstrate that, consistent with earlier reports, V4 and IT can be compared with approximately matched numbers of units, and that visual representations of object identity are more accessible to a linear population read-out in IT during IDMS.

### **Conceptualizing IDMS target match computation**

To interpret the different types of signals that might be reflected in V4 and IT during IDMS, it is useful to conceptualize how target match signals – which reflect the solution to IDMS – might be computed. When considered in terms of a single 4x4 “looking at” vs. “looking for” slice of the experimental design matrix (Fig 2b), target match signals are reflected as diagonal structure (Fig 6a, right, ‘Target match (four object)’). In the most straightforward description of target match computation, congruent ‘visual’ information (vertical structure) and ‘target identity’ information (horizontal structure) combine in a nonlinear fashion to compute target match detectors that are selective for one object presented as a target match (‘Target match (one object)’). Finally, these are pooled across the four different objects to create ‘Four object target match detectors’ that respond whenever a target is in view (Fig 6a). Consequently, the class of proposals presented in Fig 1a, where top-down modulation is integrated exclusively in V4, has at least two variants. In the first, target match signals exist in V4 and arrive in IT via a feed-forward process (Fig 6b), possibly with some linear pooling to produce target match invariance (across object identity). In the second, target identity signals (as opposed to target match signals) are reflected in V4, and IT target match signals are computed in IT via the nonlinear combination of these inputs (Fig 6c).

**Figure 6. Conceptualizing IDMS target match computation.** **a)** An idealized depiction of how target match signals, which reflect the solution to the IDMS task, might be computed. For simplicity, the computation is described for one 4x4 slice of the experimental design matrix, which corresponds to viewing each of four objects (‘Looking AT’) in the context of each of four objects as a target (‘Looking FOR’) at one transformation. In the first stage of this idealization of target match computation, a unit reflecting visual information and a unit reflecting persistent target identity information (i.e. working memory) are combined, and the result is passed through



a threshold. The resulting unit reflects target match information for one object. Next, four of these units (each with a different object preference) are linearly combined to produce a unit that signals whether a target match is present, regardless of the identity of the object. **b)** A variant of the class of “IT: Inherited” proposals (Fig 1a) in which target match information is computed in V4 and then fed forward to IT. **c)** A variant of the class of “IT: Inherited” proposals in which visual and target identity information are both present in V4 and then fed forward to IT, where they are combined to compute the target match signal. **d-e)** The response matrices corresponding to 3 example units from V4 and IT. Response matrices were plotted as the average firing rates across trials, and rescaled from the minimum (black) to maximum (white) response across all experimental conditions.

We found examples of nearly all of these types of idealized units in V4 and/or IT (Figures 6d-e). In both areas, we found ‘purely visual’ units that responded selectively to images but were not modulated by other factors, such as target identity or whether an image was presented as a target match (Fig 6d-e, ‘Purely visual’). In contrast, one notable difference between V4 and IT was the existence of a handful of IT units (~10/193) that reflected the remarkable property of responding to nearly every image presented as a target match (every object at every transformation) but not when those same images were presented as distractors (Fig 6e, ‘Target match (four object)’). We did not find any such units in V4. However, in both V4 and IT, we found units that responded preferentially to individual objects presented as target matches as compared to distractors (Fig 6d-e, ‘Target match (one object)’). We note that while these illustrative examples were chosen because they reflect intuitive forms of pure selectivity, many (if not most) units tended to reflect less intuitive mixtures of visual and task-relevant modulation.

To more quantitatively compare the types of signals reflected in V4 and IT, we extended the procedure presented in Fig 4 to not only quantify ‘visual’ modulation (i.e. modulation that can be attributed to changes in the identity of the visual image), but also other types of non-overlapping modulations that could be attributed to: ‘target identity’ modulation - changes in the identity of a sought target; ‘target match’ modulation - changes in whether an image was a target match or a distractor; and ‘residual’ modulation - nonlinear interactions between visual and target identity that are not target match modulation (e.g. an enhanced response to a particular distractor condition). When considered in terms of a single 4x4 “looking at” vs. “looking for” slice of the experimental design matrix (Fig 2c), these modulations produce vertical, horizontal, diagonal, and off-diagonal structure, respectively (Fig 7a). Notably, this analysis defines target match modulation as a differential response to the same images presented as target matches versus distractors, or equivalently, diagonal structure in the transformation slices presented in Fig 7a. Consequently, units similar to both the ‘target match (one object)’ unit as well as the ‘target match (four object)’ unit (Fig 6d-e) reflect target match modulation, as both units have a diagonal component to their responses. What differentiates these two types of units is that the ‘Target match (one object)’ unit also reflects selectivity for image and target identity, which is reflected in this analysis as a mixture of target match, visual, and target identity modulation.

**Figure 7. Evolution of different types of single unit modulations in V4 and IT. a)** To illustrate the different types of task-relevant signals that could be present in V4 and IT, shown is a slice



through the IDMS experimental design (Figure 2c), corresponding to one transformation. Shown are visual modulations, which differentiate between different objects in view (vertical structure); target identity modulations, which differentiate between different target objects (horizontal structure); target match modulations, which differentiate between whether objects appear as a target match versus a distractor (diagonal structure); and residual modulations, which differentiate between any other types of conditions (e.g. a response to a particular distractor condition such as looking for object 4 when looking at object 2). **b-e)** Modulations were computed for each type of experimental parameter in units of the standard deviations around each unit's grand mean spike count (see Results). In each panel, average modulation magnitudes across units in V4 ( $n = 598$ ) and IT ( $n = 193$ ) shown on the left as a function of time (ms after stimulus onset). Modulation magnitudes, computed in spike count bins 50 ms wide and shifted by 10 ms, are plotted corresponding to the midpoint of each bin. The bar plots show average signal magnitudes quantified within broader spike counting windows indicated by the rectangles on the left (V4: 40-210 ms, red rectangle; IT: 80-250 ms, gray rectangle). Triple asterisks denote  $p < 0.001$ ; 'ns' indicates  $p > 0.05$ . Error bars reflect the standard error of modulation across units, computed via a bootstrap procedure.

To compare these different types of task-relevant signals between V4 and IT, we applied the analysis to spike count windows positioned at sliding locations relative to stimulus onset, as well as the same counting windows described for Fig 4 (170 ms; V4: 40-210 ms; IT: 80-250 ms; Fig 7b-e). As expected, visual modulation did not exist before stimulus onset, and visual signals arrived in V4 ~ 40 ms earlier than in IT in both animals (Fig 7b). In contrast, modulations reflecting information about whether an image was a target match or a distractor ('target match' modulation) were considerably smaller in V4 as compared to IT in both animals (Fig 7c; monkey 1  $p < 0.001$ ; monkey 2  $p < 0.001$ ). In monkey 1, V4 target match modulations increased throughout the viewing period, and reached levels that were similar to those found in IT, but this rise occurred with a delay in V4 relative to IT. This was not replicated in monkey 2, where target match modulations were small throughout the viewing period.

Modulations reflecting information about the identity of the target ('target identity' modulation) were present in both V4 and IT before stimulus onset (Fig 7c), consistent with persistent working memory signals in both brain areas. These persistent signals were stronger in IT as compared to V4 in monkey 1 ( $p < 0.001$ ) but comparable in size between V4 and IT in monkey 2 ( $p = 0.23$ ). Lastly, we found that in both V4 and IT, residual modulation was small relative to the other types of modulations (Fig 7e). Residual modulation was comparable in size between V4 and IT in monkey 1 ( $p = 0.46$ ) and larger in IT than V4 in monkey 2 ( $p < 0.001$ ). To summarize these results, we found that in both monkeys, visual modulation was matched between V4 and IT whereas target match signals were weaker in V4. We also found persistent target identity signals that were reflected in both areas before and throughout the stimulus-evoked period.

As a complementary analysis, we also quantified the total amount of non-visual, 'cognitive' modulation (combined target match, target identity, and residual modulation), and compared it to the evolution of the visual modulation (Fig 8). In both brain areas, total cognitive modulation was considerable throughout the analysis window. During the latency-corrected stimulus-evoked period, cognitive modulations were 41% and 81% the size of the visual modulations in V4 and IT, respectively. These results demonstrate that considerable non-visual, task-relevant modulations exist in both brain areas, and they also suggest that these are smaller in V4 as compared to IT.

**Figure 8. Single unit cognitive modulations in V4 and IT cortex. a-b)** Cognitive modulations (V4: light red; IT: light gray) were computed as the sum of target identity, target match, and residual modulations, and are shown alongside visual modulations (V4: dark red; IT: dark gray). Mean modulation magnitudes are computed in the same manner and shown with the same conventions as Fig 7. Labels in the bar plots above the cognitive modulation magnitudes indicate the proportional size of cognitive relative to visual modulations in each brain area.

Below we focus on how these data constrain descriptions of how top-down task-relevant signals combine with feed-forward visual information during IDMS (e.g. Fig 1; Fig 6b,c). As an overview, we begin by evaluating the variant of the “IT: Inherited” class in which IT target match signals are inherited directly from V4 (Fig 6b), both under the assumption that IT uniformly samples V4 units, as well as when IT is allowed to preferentially sample the “best” V4 units. Next, we evaluate the variant of the “IT: Inherited” class that allows for IT nonlinear computation applied to input arriving from V4 (Fig 6c). After ruling out both of these proposals, we conclude that during the IDMS task, top-down signals must be integrated directly within IT (Fig 1b).

### **Could target match signals arrive in IT via input from the “best” V4 neurons?**

The results presented in Fig 7c demonstrate that target match signals are, on average, larger in IT than V4. This suggests that target match signals are unlikely to arrive in IT from V4 via a simple feed-forward process, under the assumption that IT uniformly samples V4 neurons. However, evidence from other studies suggests that the brain can learn to preferentially read-out the subset of neurons that carry the most task-relevant information with extensive training (Law and Gold 2009) and the monkeys involved in these experiments were trained extensively. Could a version of the feed-forward proposal in which IT preferentially samples the “best” V4 neurons account for our data? To allow us to address this question, we sampled 3-fold more units in V4 as compared to IT, consistent with anatomical estimates of the ratios of neurons between the two brain areas (DiCarlo et al. 2012). This allowed us to compare V4 and IT under different assumptions, including that IT sampled V4 units “uniformly” versus the “best” subset with regard to the amount of IDMS information reflected in their responses.

Target match signals, reflected as diagonal matrix structure (e.g. target match units for one object or across multiple objects; Fig 6a) translate into a linearly separable representation of the same images presented as target matches as compared to distractors (Fig 9a). To quantify the amount of linearly separable target match information in V4 and IT, we computed the cross-validated performance of a linear classifier to perform this 2-way classification at each transformation separately and then averaged over transformations (Fig 9b, see Methods). To verify that uniform sampling of V4 could not account for target match information in IT, we randomly selected IT units up to the total numbers of units that we recorded (Fig 9c, gray), and compared this to a random selection of V4 units for matched sized populations (and thus always a subset of the V4 data Fig 9c, red). As expected based on the results presented in Fig 7c, cross-validated population performance was higher than chance in V4, but was significantly higher in IT as compared to V4 (Fig 9c, gray versus red; in both monkeys, compared at  $n = 98$  in monkey 1 and  $n = 95$  in monkey 2,  $p < 0.001$ ). These results verify that IT target match

information is not directly inherited from V4 under the assumption of a uniform sampling of V4 by IT.

To assess whether a “best” sampling description of V4 by IT could account for our data, we recomputed performance for V4 and IT populations that were matched in size, but when only the top-ranked V4 units were included. In this analysis, units were ranked based on the training data before computing cross-validated performance. We found that V4 performance was slightly higher for the best units as compared to randomly selected units (Fig 9c, cyan vs. red), however, performance for the best V4 units remained lower than IT performance in both monkeys (Fig 9c, cyan vs. gray,  $p < 0.001$ ). These results suggest that during IDMS, IT target match modulation cannot be accounted for via feed-forward propagation of this modulation from V4, even if IT were to sample from the “best” V4 subset (Fig 6b).

**Figure 9.** *A comparison of linearly separable target match information in V4 and IT. a-b)* The IDMS task can be envisioned as a two-way classification of the same images presented as target matches versus as distractors. Shown are cartoon depictions where each point depicts a hypothetical population response for a population of two neurons on a single trial, and clusters of points depict the dispersion of responses across repeated trials for the same condition. Included are the hypothetical responses to the same images presented as target matches (black) and as distractors (gray). The dotted line depicts a hypothetical linear decision boundary. **a)** A schematic of two neurons that each respond to one object as a target match. In this scenario, target matches and distractors are linearly separable. **b)** A schematic of the IDMS task, where four images must be classified as target matches as compared to distractors, applied to a linearly separable representation. **c)** Performance of a linear classifier trained to classify whether an object was a target match or a distractor, invariant of the object’s identity (at one transformation). Performance was assessed at each identity-preserving transformation (‘Big’, ‘Left’, ‘Small’, ‘Up’), and then averaged. Performance was higher in IT (gray) than in V4, both when V4 units were sampled uniformly from the full population (red) and when V4 units were sampled by choosing the best possible V4 units based on the training data (cyan). Monkey 1:  $n = 98$  units, Monkey 2:  $n = 95$  units. Error bars (standard error) reflect the variability that can be attributed to the specific subset of trials chosen for training and testing, and, for subsets of units smaller than the full population, the specific subset of units chosen. Dashed line indicates chance performance.

### **Could target match signals arrive in IT via nonlinear combinations of input from V4?**

To evaluate the variant of the matched proposal in which IT target match signals are computed via nonlinear combinations of inputs arriving from V4 (Fig 6c), we quantified the “total” target match information in each brain area, regardless of its format. Specifically, combinations of visual and target identity signals (reflected in different units) map to target match information present in a nonlinearly separable format (Fig 10a) whereas target match signals map to target match information that is linear (Fig 9a) and a measure of total target match information quantifies information regardless of its format.

Total target match information was measured as cross-validated performance on the same 2-way classification as presented in Fig 9, but for a maximum likelihood (as opposed to linear) classifier (see Methods). This nonlinear classifier assesses the total amount of target match information regardless of its format (combined linear and nonlinear). Cross-validated population performance was higher than chance in V4 (Fig 10b, filled red points; in both monkeys, compared at  $n = 98$  in monkey 1 and  $n = 95$  in monkey 2,  $p < 0.001$ ), but was also higher in IT as compared to V4 (Fig 10b, gray; in both monkeys, compared at  $n = 98$  in monkey 1 and  $n = 95$  in monkey 2,  $p < 0.001$ ). These results suggest that IT target match information is not exclusively inherited via feed-forward projections arriving from V4 (Fig 1a; Fig 6b-c), but rather, integrated directly in IT itself (Fig 1b).

**Figure 10. A comparison of total (linear and nonlinear) target match information in V4 and IT. a)** A schematic of two neurons, one ‘visual’ neuron and one ‘target identity’ neuron. In this scenario, target match information exists, but is present in a non-linearly separable format. **b)** A schematic of the IDMS task where four images must be classified as target matches versus distractors, applied to a nonlinearly separable representation. **c)** Performance of a nonlinear, maximum likelihood classifier trained to classify between whether an object was a target match or a distractor, invariant of object identity. Performance was assessed at each identity-preserving transformation, and then averaged. Error bars (standard error) reflect the variability that can be attributed to the specific subset of trials chosen for training and testing, and, for subsets of units smaller than the full population, the specific subset of units chosen. Dashed line indicates chance performance.

## DISCUSSION

Finding sought objects requires the brain to compare visual information about the objects in view with information about the currently sought target to compute a signal that reports when a target match has been found. During object search, information about the identity of a sought target and/or whether it is a target match is thought to be fed-back to mid to higher stages of the ventral visual pathway, including V4 and IT, but the specific path this information takes is unclear. In this study, we sought to differentiate between scenarios in which top-down information is integrated directly in IT (Fig 1b) versus those in which it is integrated in V4 and arrives in IT via feed-forward propagation (Fig 1a). We evaluated a number of feed-forward descriptions between V4 and IT, and found none of them could account for the amount of non-visual, task-relevant information present in IT. These included a model in which IT uniformly samples target match signals from V4 (Fig 9, red), a model in which IT preferentially samples target match signals from the best V4 units (Fig 9, cyan), and a model that allowed for IT nonlinear processing of inputs arriving from V4 (Fig 10). Together, these results suggest that during IDMS, top-down, task-specific signals in IT are not exclusively inherited from V4 but rather are integrated within IT, at least in part.

We found non-visual, task-specific signals to be sizeable in V4 (~40% of the size of visual modulation), consistent with many other reports (Moran and Desimone 1985; Haenny et al. 1988; Motter 1994; Motter 1994; Luck et al. 1997; McAdams and Maunsell 1999; McAdams and Maunsell 2000; Chelazzi et al. 2001; Ogawa and Komatsu 2004; Bichot et al. 2005; Hayden and Gallant 2005; Mirabella et al. 2007; Cohen and Maunsell 2009; Kosai et al. 2014). At the same time, we also found that non-visual, task-specific modulations to be even larger in IT (~80% the size of visual modulation). In a previous study, during a visual target search task in which monkeys made a saccade to a target match following the presentation of a sample image, non-visual, task-specific signals were reported to be more similar in V4 and IT (63% and 70% of the visually-evoked response in V4 and IT, respectively; Chelazzi et al. 1998; Chelazzi et al. 2001). One notable difference between our study and this earlier work is that our study compared V4 and IT during a version of the delayed-match-to-sample task in which sought target objects could appear at different positions, sizes and background contexts. The fact that top-down, task-specific signals were considerably larger in IT versus V4 in our task may follow from the fact that IT contains a more explicit, linear representation of object identity across these transformations than V4 (reviewed by DiCarlo et al. 2012). Consequently, top-down modulation may be targeted directly to IT in situations that require an invariant object representation whereas the brain might target the pathway differently when tasks have different computational requirements. For example, because V4 receptive fields are smaller and retinotopically organized, V4 might serve as the primary locus for the integration of top-down signals for tasks that require spatial specificity, such as covert spatial attention tasks, and in these tasks little top-down integration might occur in IT (Moran and Desimone 1985). Only one earlier study has reported on the responses of IT neurons in the context of a DMS task in which, objects could appear at different identity-preserving transformations (Leuschow et al. 1994), but this study did not measure signals in V4.

Our results, which demonstrate larger non-visual, task-relevant modulations in IT as compared to V4, are consistent with more general interpretations that the magnitudes of top-down modulation exist in a gradient-like fashion hierarchically along the ventral visual pathway (reviewed by Noudoost et al. 2010). As described above, such gradients are consistent both with the integration of top-down modulation at multiple stages of the pathway (Fig 1a) as well as



integration at a single locus, followed by feedback within the pathway itself (Fig 1b, right). One study (Buffalo et al. 2010) provided evidence supporting the latter description in V1, V2 and V4 in the form of noting that not only the magnitude of modulation was greater in higher visual areas, but it also arrived earlier, consistent with a feed-back description. In our data, this issue was ambiguous: we found that in one monkey, the arrival of the target match signal appeared to be delayed in V4 as compared to IT (Fig 7c, Monkey 1) whereas in the other animal, it appeared to arrive earlier (Figure 7c, Monkey 2).

In an earlier series of reports, we compared the responses of IT and its projection area, perirhinal cortex, during a more classic version of the delayed-match-to-sample task (that did not incorporate variation in the objects' transformations; Pagan et al. 2013; Pagan and Rust 2014; Pagan et al. 2016). We found that the responses of perirhinal cortex were well-described by a model in which top-down, task-relevant signals were integrated within or before IT consistent with a feed-forward process between IT and perirhinal cortex. The results presented here extend this understanding to suggest that the locus of top-down integration during DMS search tasks is unlikely to exclusively be V4, and that some amount of top-down integration is likely to happen directly within IT itself.

Computing a target match signal requires the combination of the visual representation of the currently viewed scene with a remembered representation of the sought target (e.g. Fig 6a). In an analysis of the same IT data presented here, we found that the IT population misclassified trials on which the monkeys made errors, supporting notions that the IT target match signal is in fact related to the neural signals used to make target match behavioral judgments (Roth and Rust 2018). The additional target match information present in IT that is not also present in V4 could reflect the implementation of this comparison in IT itself, or alternatively, the comparison might be implemented in a higher order brain area and fed-back to IT cortex. The timing of the arrival of this signal in IT (which peaks at ~150 ms; Fig 7c) relative to the monkeys' median reaction times (~335 ms; Fig 2e), does not rule out the former scenario, but with our data we cannot definitively distinguish between these alternatives. Additionally, in this study monkeys were trained extensively on the images used in these experiments and future experiments will be required to address the degree to which these results hold under more everyday conditions in which monkeys are viewing images and objects for the first time.



# References:

- 1108
- 1109
- 1110 Bichot, N. P., A. F. Rossi and R. Desimone (2005) Parallel and serial neural mechanisms for
- 1111 visual search in macaque area V4. *Science* 308(5721): 529-534.
- 1112
- 1113 Buffalo, E. A., P. Fries, R. Landman, H. Liang and R. Desimone (2010) A backward progression
- of attentional effects in the ventral stream. *Proc Natl Acad Sci U S A* 107(1): 361-365.
- 1114
- 1115 Chelazzi, L., J. Duncan, E. K. Miller and R. Desimone (1998) Responses of neurons in inferior
- temporal cortex during memory-guided visual search. *J. Neurophysiology* 80: 2918-2940.
- 1116
- 1117 Chelazzi, L., E. K. Miller, J. Duncan and R. Desimone (1993) A neural basis for visual search in
- inferior temporal cortex. *Nature* 363: 345-347.
- 1118
- 1119 Chelazzi, L., E. K. Miller, J. Duncan and R. Desimone (2001) Responses of neurons in macaque
- area V4 during memory-guided visual search. *Cereb Cortex* 11(8): 761-772.
- 1120
- 1121 Cohen, M. R. and J. H. Maunsell (2009) Attention improves performance primarily by reducing
- interneuronal correlations. *Nat Neurosci* 12(12): 1594-1600.
- 1122
- 1123 Desimone, R. and S. J. Schein (1987) Visual properties of neurons in area V4 of the macaque:
- sensitivity to stimulus form. *J Neurophysiol* 57(3): 835-868.
- 1124
- 1125 DiCarlo, J. J., D. Zoccolan and N. C. Rust (2012) How does the brain solve visual object
- recognition? *Neuron* 73(3): 415-434.
- 1126
- 1127 Eskandar, E. N., B. J. Richmond and L. M. Optican (1992) Role of inferior temporal neurons in
- 1128 visual memory I. Temporal encoding of information about visual images, recalled images, and
- behavioral context. *Journal of Neurophysiology* 68: 1277-1295.
- 1129
- 1130 Felleman, D. J. and D. C. Van Essen (1991) Distributed hierarchical processing in the primate
- cerebral cortex. *Cereb Cortex* 1(1): 1-47.
- 1131
- 1132 Gattass, R., A. P. Sousa and C. G. Gross (1988) Visuotopic organization and extent of V3 and
- V4 of the macaque. *J Neurosci* 8(6): 1831-1845.
- 1133
- 1134 Gibson, J. R. and J. H. R. Maunsell (1997) The sensory modality specificity of neural activity
- related to memory in visual cortex. *Journal of Neurophysiology* 78: 1263-1275.

1135 Haenny, P. E., J. H. Maunsell and P. H. Schiller (1988) State dependent activity in monkey  
1136 visual cortex. II. Retinal and extraretinal factors in V4. *Exp Brain Res* 69(2): 245-259.

1137 Hayden, B. Y. and J. L. Gallant (2005) Time course of attention reveals different mechanisms  
1138 for spatial and feature-based attention in area V4. *Neuron* 47(5): 637-643.

1139 Hung, C. P., G. Kreiman, T. Poggio and J. J. DiCarlo (2005) Fast readout of object identity from  
1140 macaque inferior temporal cortex. *Science* 310(5749): 863-866.

1141 Kosai, Y., Y. El-Shamayleh, A. M. Fyall and A. Pasupathy (2014) The role of visual area V4 in  
1142 the discrimination of partially occluded shapes. *J Neurosci* 34(25): 8570-8584.

1143 Law, C. T. and J. I. Gold (2009) Reinforcement learning can account for associative and  
1144 perceptual learning on a visual-decision task. *Nat Neurosci* 12(5): 655-663.

1145 Leuschow, A., E. K. Miller and R. Desimone (1994) Inferior temporal mechanisms for invariant  
1146 object recognition. *Cerebral Cortex* 5: 523-531.

1147 Luck, S. J., L. Chelazzi, S. A. Hillyard and R. Desimone (1997) Neural mechanisms of spatial  
1148 selective attention in areas V1, V2, and V4 of macaque visual cortex. *J Neurophysiol* 77(1): 24-  
1149 42.

1150 Maunsell, J. H., G. Sclar, T. A. Nealey and D. D. DePriest (1991) Extraretinal representations in  
1151 area V4 in the macaque monkey. *Vis Neurosci* 7(6): 561-573.

1152 McAdams, C. J. and J. H. Maunsell (1999) Effects of attention on orientation-tuning functions of  
1153 single neurons in macaque cortical area V4. *J Neurosci* 19(1): 431-441.

1154 McAdams, C. J. and J. H. Maunsell (2000) Attention to both space and feature modulates  
1155 neuronal responses in macaque area V4. *J Neurophysiol* 83(3): 1751-1755.

1156 Miller, E. K. and R. Desimone (1994) Parallel neuronal mechanisms for short-term memory.  
1157 *Science* 263(5146): 520-522.

1158 Mirabella, G., G. Bertini, I. Samengo, B. E. Kilavik, D. Frilli, C. Della Libera and L. Chelazzi  
1159 (2007) Neurons in area V4 of the macaque translate attended visual features into behaviorally  
1160 relevant categories. *Neuron* 54(2): 303-318.

1161 Moran, J. and R. Desimone (1985) Selective attention gates visual processing in the extrastriate  
1162 cortex. *Science* 229(4715): 782-784.

1163 Motter, B. C. (1994) Neural correlates of attentive selection for color or luminance in extrastriate  
1164 area V4. *J Neurosci* 14(4): 2178-2189.

1165 Motter, B. C. (1994) Neural correlates of feature selective memory and pop-out in extrastriate  
1166 area V4. *J Neurosci* 14(4): 2190-2199.

1167 Noudoost, B., M. H. Chang, N. A. Steinmetz and T. Moore (2010) Top-down control of visual  
1168 attention. *Curr Opin Neurobiol* 20(2): 183-190.

1169 Ogawa, T. and H. Komatsu (2004) Target selection in area V4 during a multidimensional visual  
1170 search task. *J Neurosci* 24(28): 6371-6382.

1171 Op De Beeck, H. and R. Vogels (2000) Spatial sensitivity of macaque inferior temporal neurons.  
1172 *J Comp Neurol* 426(4): 505-518.

1173 Pagan, M. and N. C. Rust (2014) Dynamic target match signals in perirhinal cortex can be  
1174 explained by instantaneous computations that act on dynamic input from inferotemporal cortex.  
1175 *J Neurosci* 34(33): 11067-11084.

1176 Pagan, M. and N. C. Rust (2014) Quantifying the signals contained in heterogeneous neural  
1177 responses and determining their relationships with task performance. *J Neurophysiol* 112(6):  
1178 1584-1598.

1179 Pagan, M., E. P. Simoncelli and N. C. Rust (2016) Neural Quadratic Discriminant Analysis:  
1180 Nonlinear Decoding with V1-Like Computation. *Neural Comput*: 1-29.

1181 Pagan, M., L. S. Urban, M. P. Wohl and N. C. Rust (2013) Signals in inferotemporal and  
1182 perirhinal cortex suggest an untangling of visual target information. *Nat Neurosci* 16(8): 1132-  
1183 1139.

1184 Roth, N. and N. C. Rust (2018) Inferotemporal cortex multiplexes behaviorally-relevant target  
1185 match signals and visual representations in a manner that minimizes their interference. *PLoS*  
1186 *ONE* In press.

1187 Rust, N. C. and J. J. DiCarlo (2010) Selectivity and tolerance ("invariance") both increase as  
1188 visual information propagates from cortical area V4 to IT. *J Neurosci* 30(39): 12978-12995.

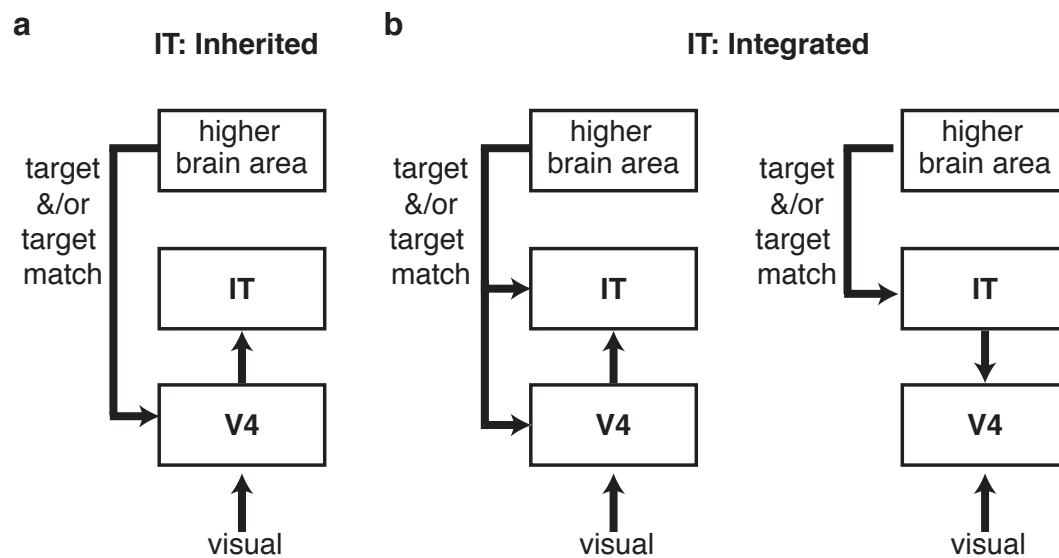

**Figure 1**

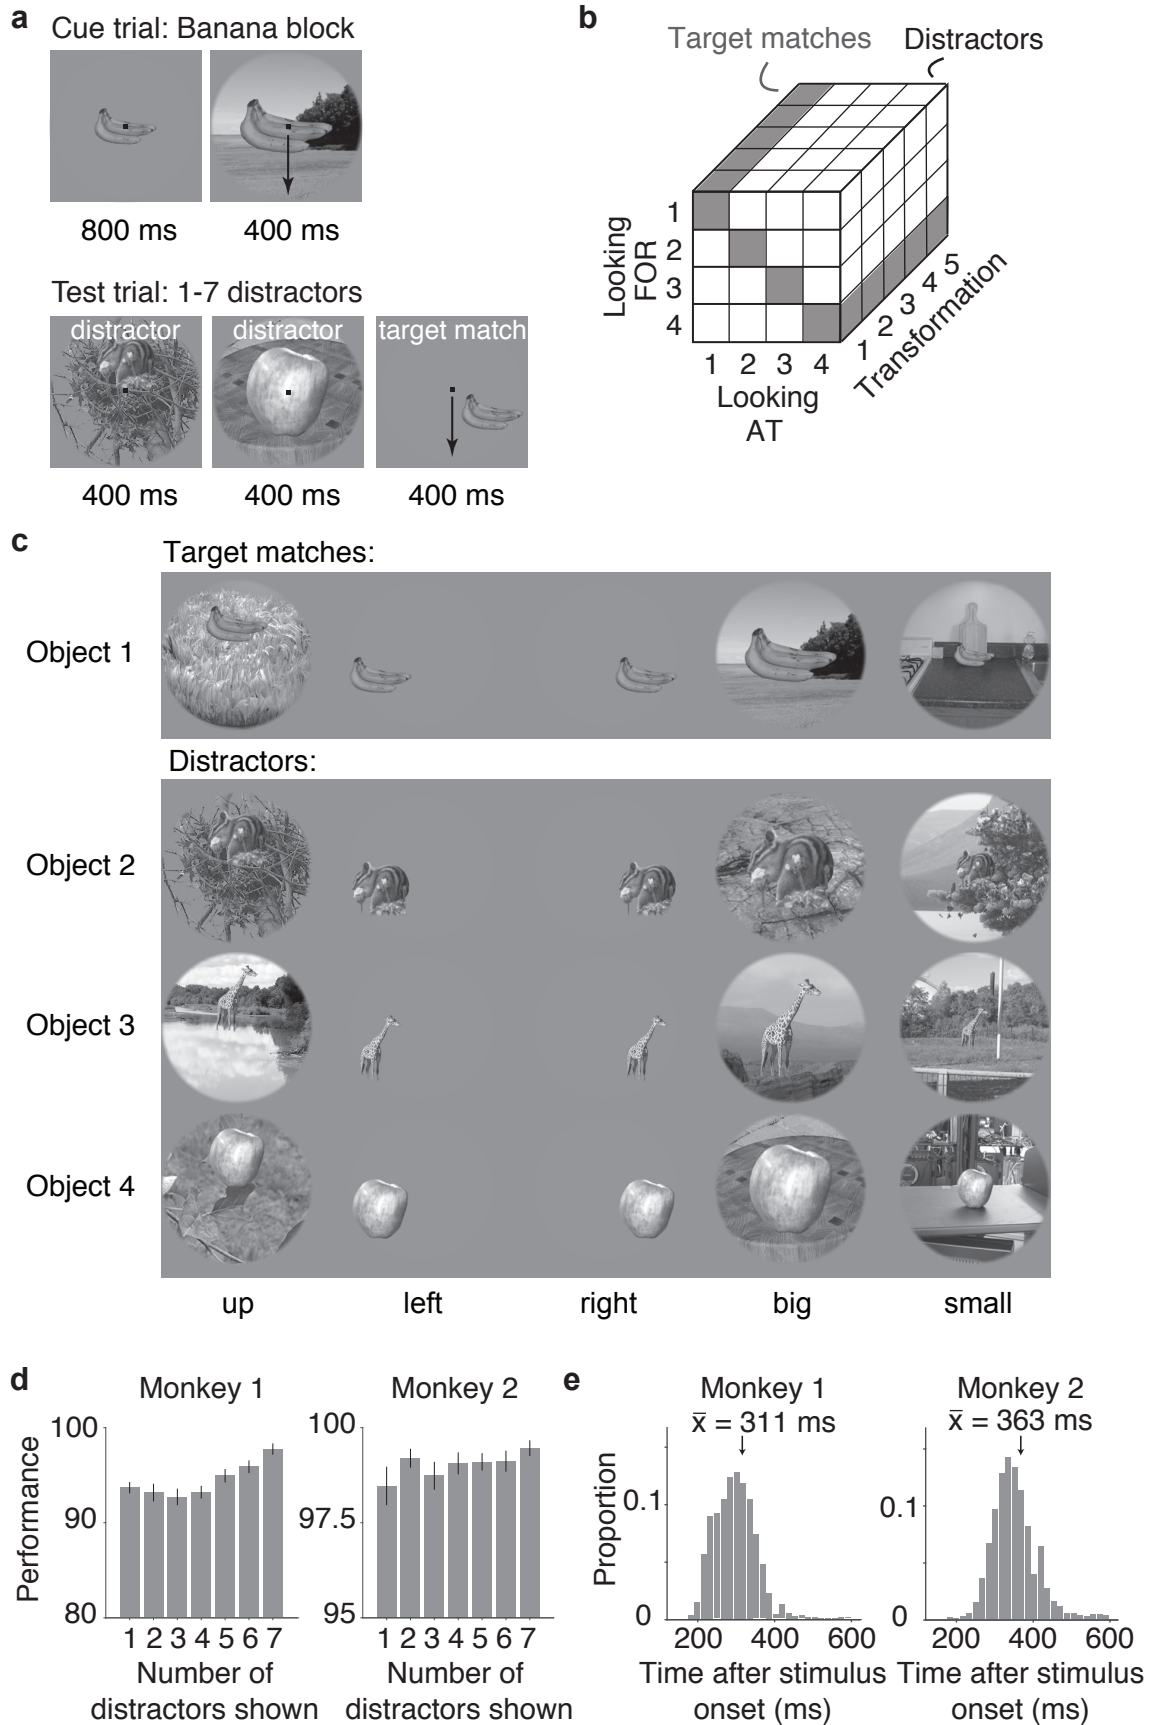

Figure 2

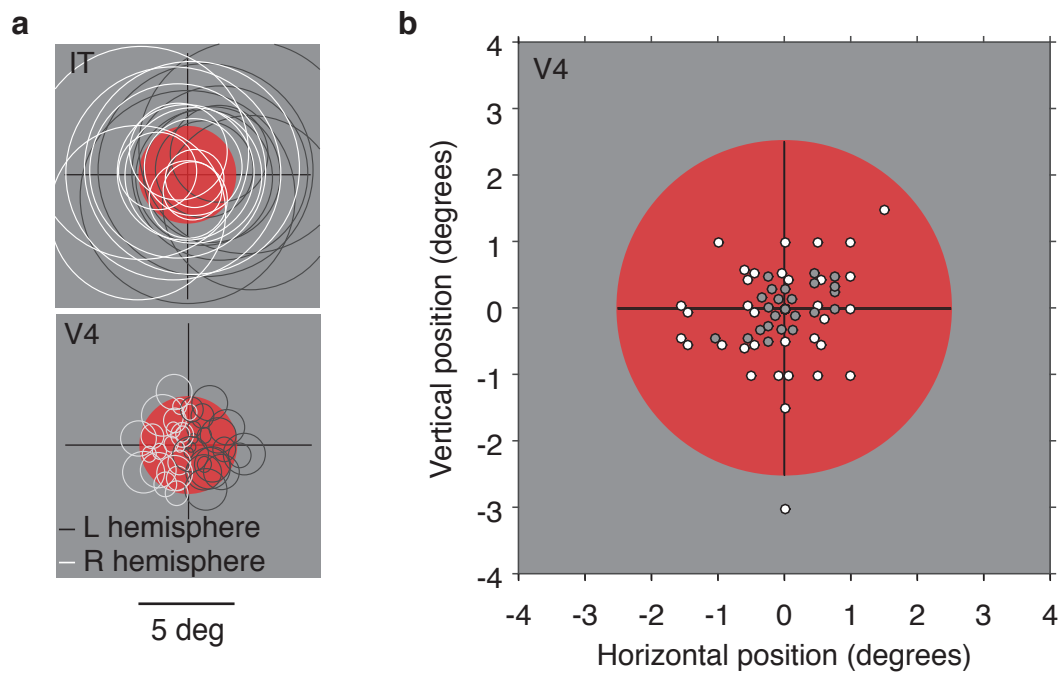

**Figure 3**



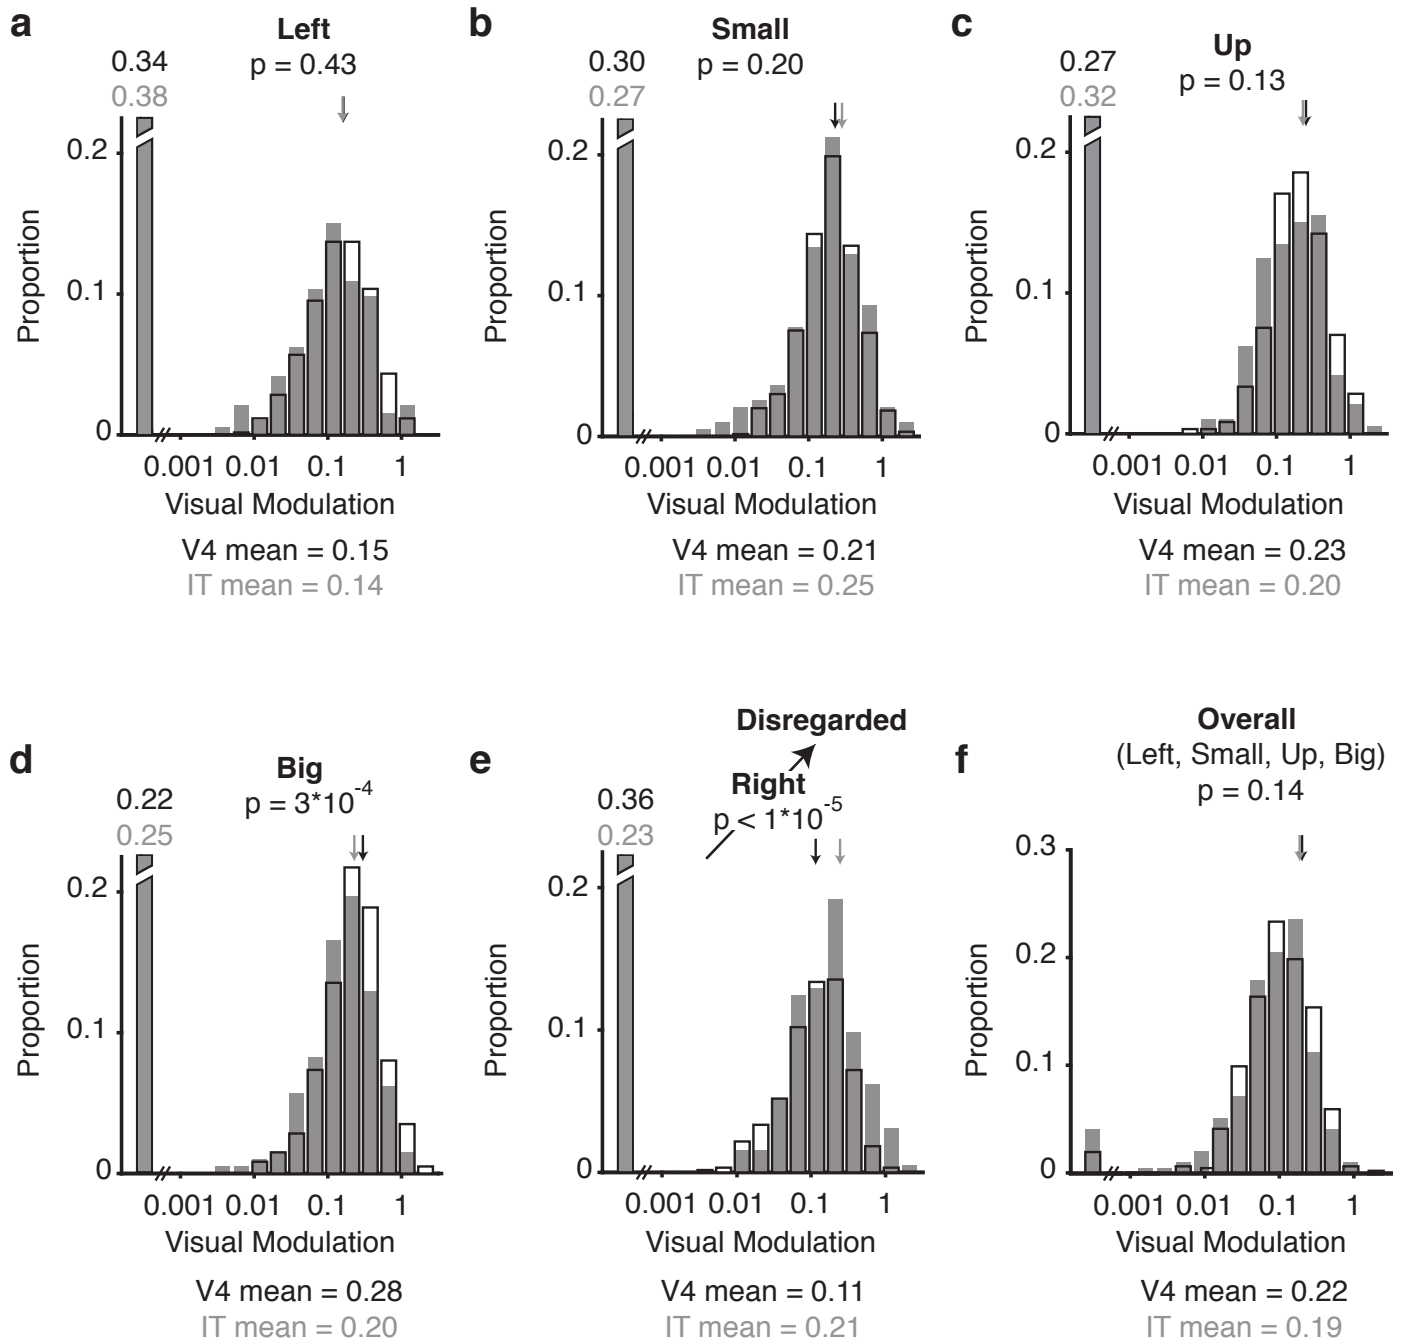

Figure 4

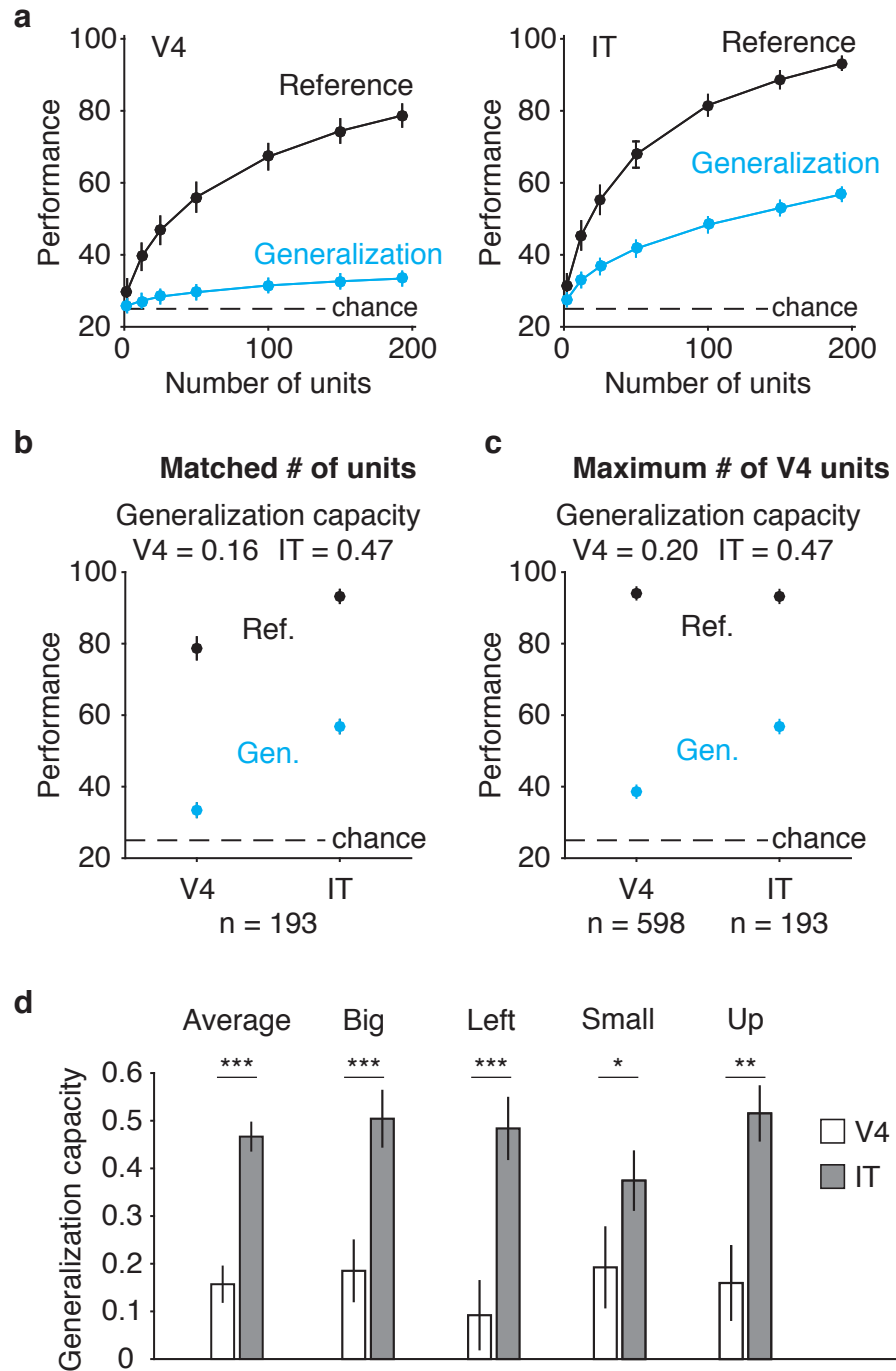

Figure 5

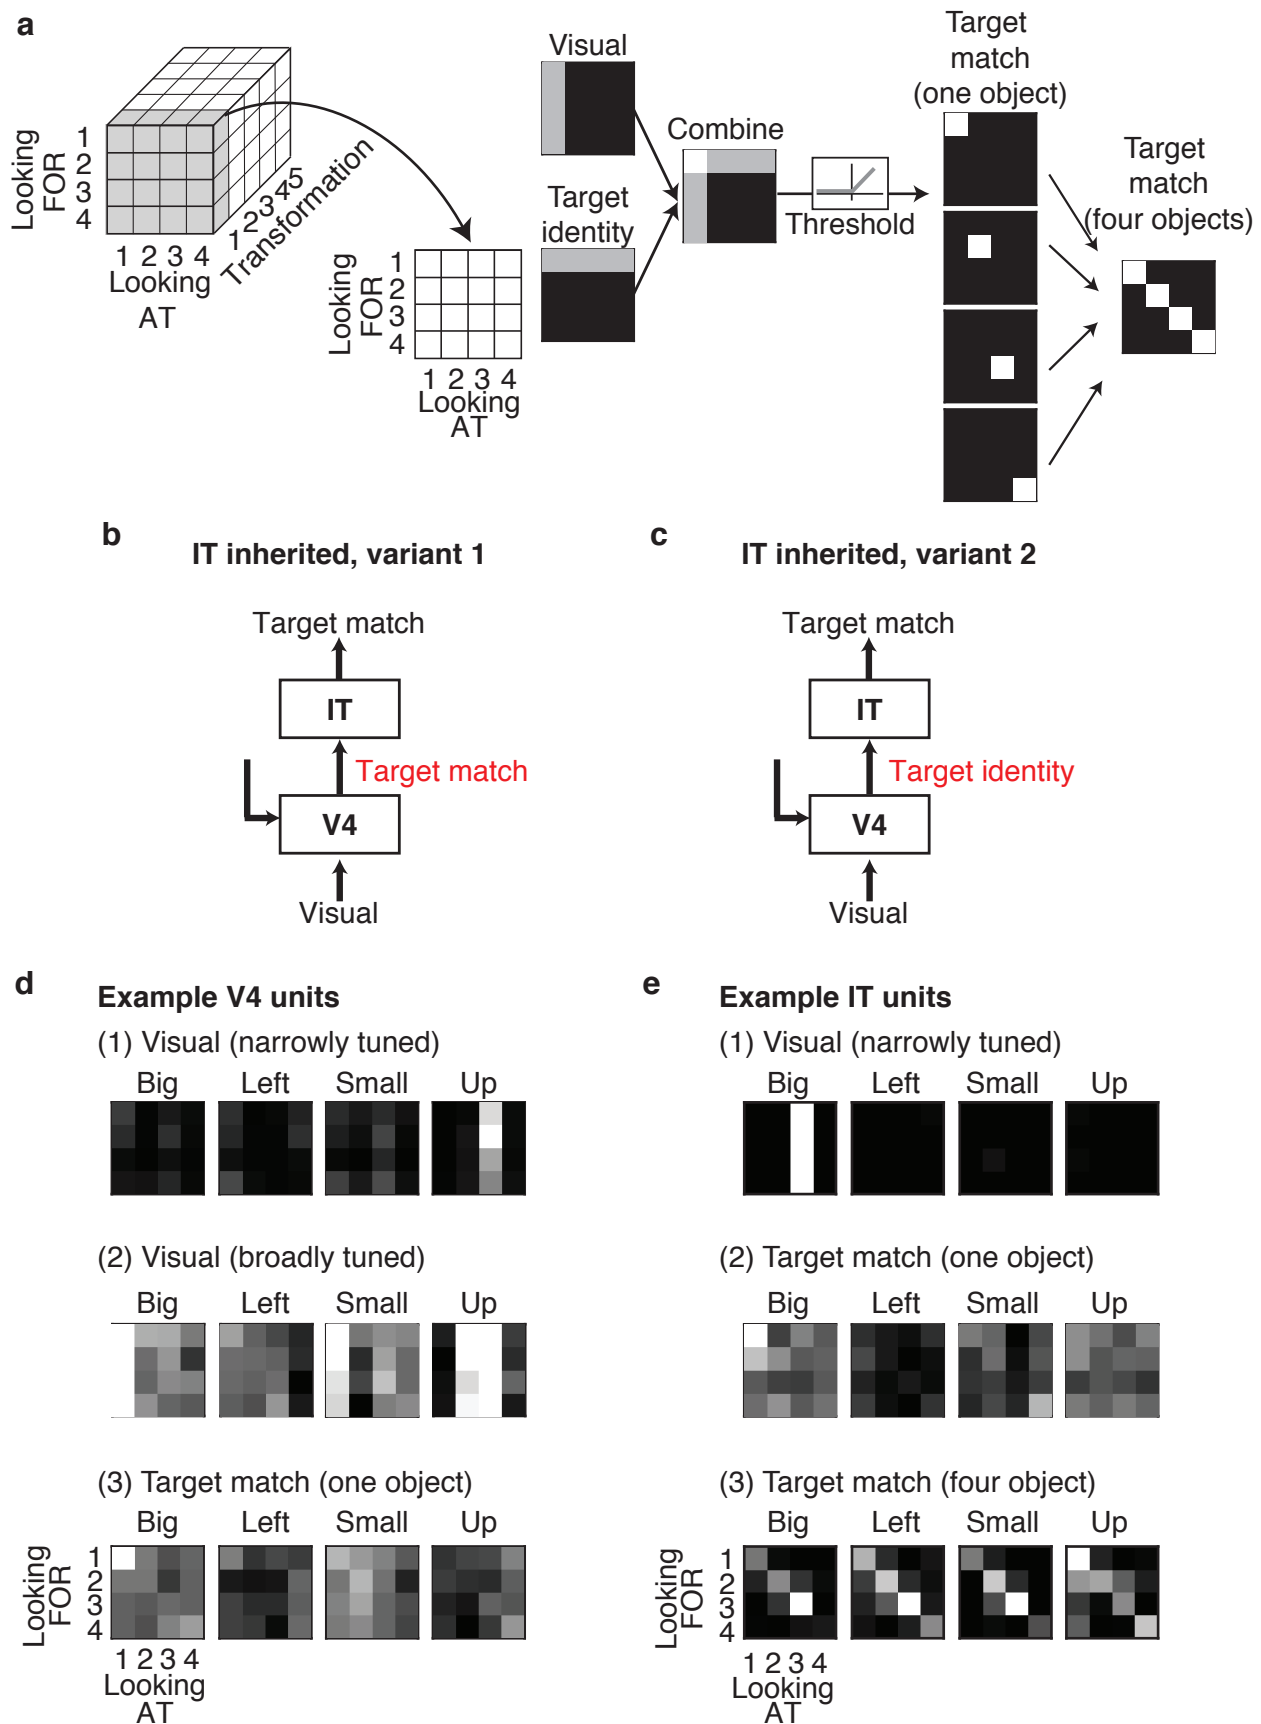

Figure 6

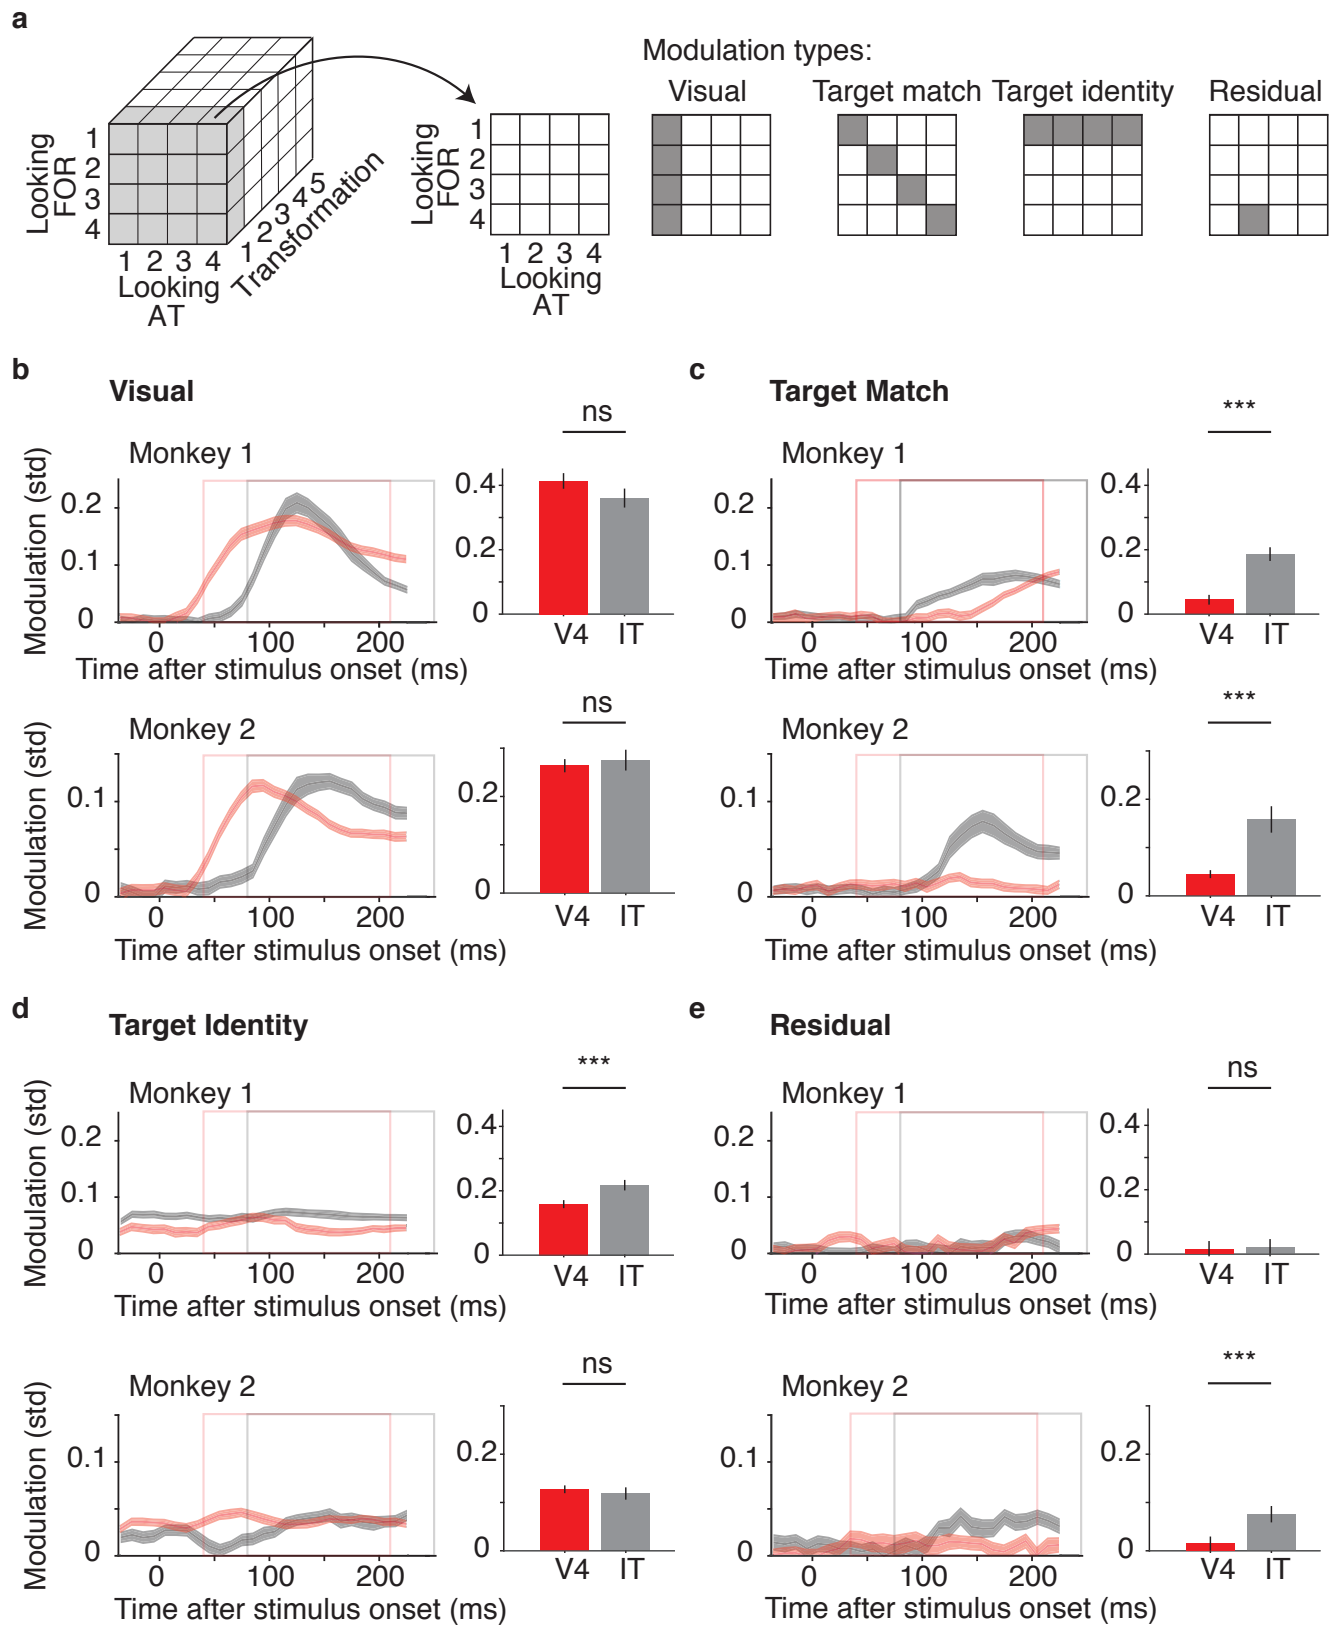

**Figure 7**

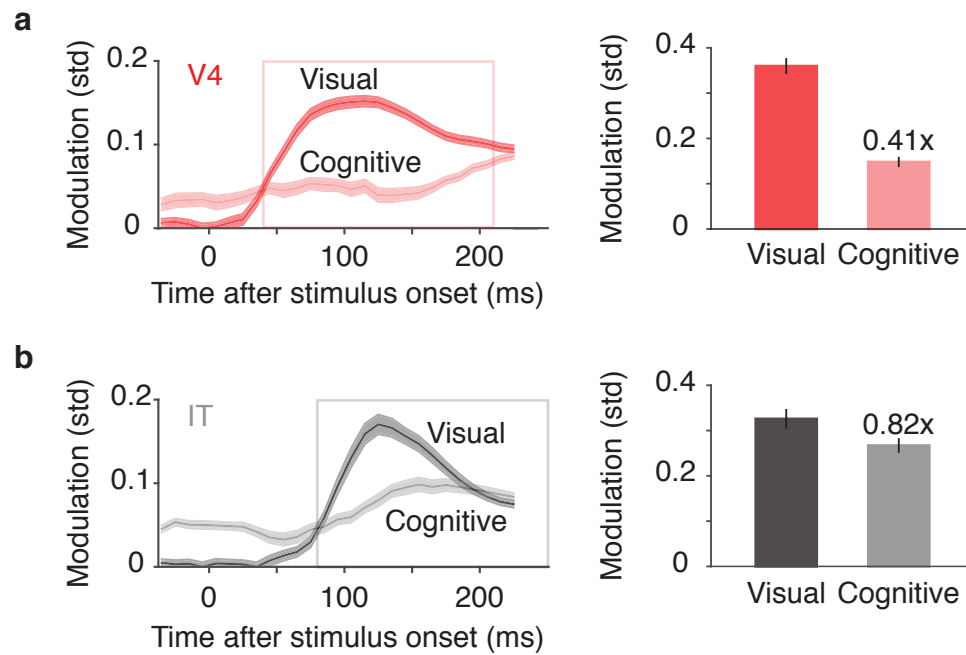

**Figure 8**

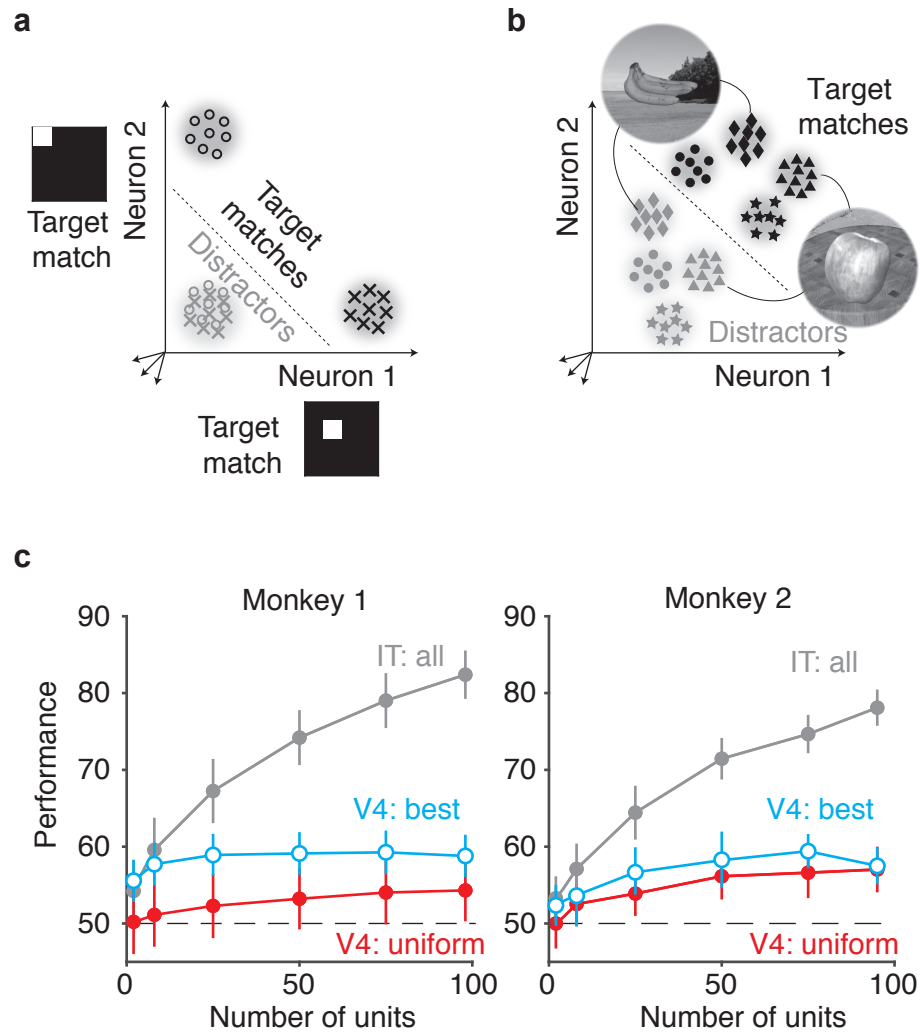



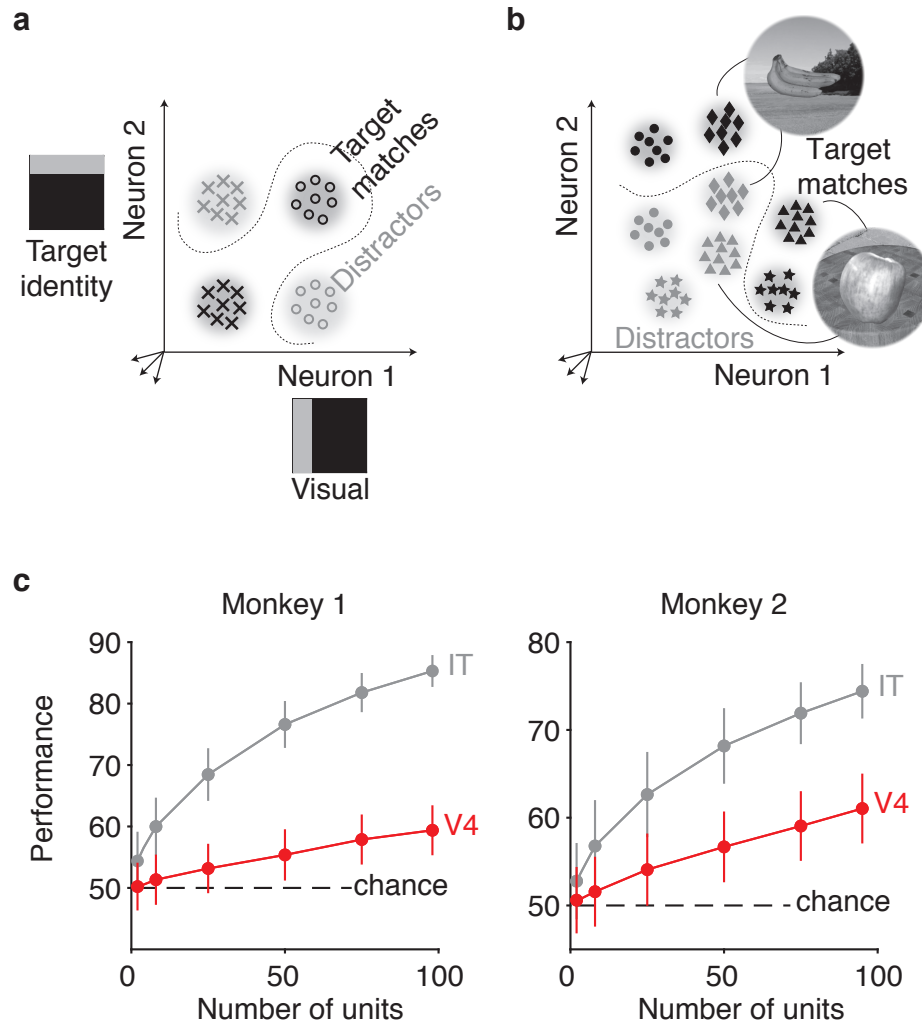

**Figure 10**
